# Supplementary material for: Worker Personality and Its Association with Spatially Structured Division of Labor
Source: PLoS One. 2014 Jan 30;9(1):e79616. doi: 10.1371/journal.pone.0079616 (PMC3907378; doi:10.1371/journal.pone.0079616)
Supplement: Raw Data S1 — (XLS) [file pone.0079616.s006.xls]

## Sheet: spatial positions
			spatial fidelity:						spatial flexibility:							morphometry:
			number of scans where an ant was recorded…								number of scans where an ant was recorded (in subnests)
individual no.	nest no.	original position	outside	near brood	near queen	at entrance	elsewhere in the nest	near virgin queen	type of subnest	subnest	outside	near brood	near queen	at nest entrance	elsewhere in the nest	head width	head length	thorax width	thorax length	ovary length	no. of ovarioles
639	M20	Q	0	1	4	0	1	4	B	B10	2	7	2	0	9	NA	NA	NA	NA	NA	NA
646	M20	Q	0	2	4	0	1	3	B	B10	0	16	1	0	3	NA	NA	NA	NA	NA	NA
643	M20	Q	4	0	2	0	2	2	B	B10	0	3	0	0	17	1.146	1.209	0.761	1.303	1.783	NA
644	M20	Q	3	0	1	0	4	2	B	B10	0	6	0	0	14	NA	NA	NA	NA	NA	NA
624	M20	B	3	0	1	0	5	1	B	B10	0	7	1	0	12	1.103	1.2	0.731	1.323	1.705	NA
627	M20	B	2	2	0	0	5	1	B	B10	0	7	2	0	11	NA	NA	NA	NA	NA	NA
645	M20	Q	0	2	7	0	0	1	B	B10	0	15	4	0	1	NA	NA	NA	NA	NA	NA
303	M12	B	0	4	3	0	1	1	B	B5	0	17	3	0	0	NA	NA	NA	NA	NA	NA
316	M12	Q	1	0	4	0	3	1	N	N5	0	14	6	0	0	NA	NA	NA	NA	NA	NA
11	M2	O	6	1	0	0	3	0	NA	NA	0	0	0	0	0	NA	NA	NA	NA	NA	NA
33	M2	B	0	6	4	0	0	0	B	B1	0	16	4	0	0	1.129	1.21	0.73	1.387	2.12	2
37	M2	B	1	7	1	0	1	0	B	B1	1	0	0	0	1	NA	NA	NA	NA	NA	NA
39	M2	B	2	7	0	0	1	0	NA	NA	0	0	0	0	0	NA	NA	NA	NA	NA	NA
40	M2	B	2	4	0	1	3	0	N	N1	6	5	2	0	1	NA	NA	NA	NA	NA	NA
42	M2	B	0	9	1	0	0	0	B	B1	0	13	4	0	3	1.095	1.228	0.693	1.362	2.102	2
43	M2	B	0	2	1	0	7	0	N	N1	10	6	0	1	3	0.996	1.099	0.65	1.18	1.432	2
44	M2	Q	1	8	0	0	1	0	B	B1	0	17	2	0	1	NA	NA	NA	NA	NA	NA
52	M2	Q	2	5	1	0	2	0	NA	NA	0	0	0	0	0	NA	NA	NA	NA	NA	NA
53	M2	Q	0	5	0	0	5	0	N	N1	2	15	1	0	2	1.028	1.095	0.647	1.266	2.122	2
58	M2	Q	9	0	0	0	1	0	O	D1	5	0	0	0	0	NA	NA	NA	NA	NA	NA
64	M2	E	10	0	0	0	0	0	O	D1	11	0	0	0	0	NA	NA	NA	NA	NA	NA
94	M3	O	10	0	0	0	0	0	O	D2	2	0	0	0	0	NA	NA	NA	NA	NA	NA
99	M3	O	8	0	0	0	2	0	O	D2	1	0	0	0	1	NA	NA	NA	NA	NA	NA
106	M3	O	10	0	0	0	0	0	NA	NA	0	0	0	0	0	NA	NA	NA	NA	NA	NA
111	M3	B	6	3	0	0	1	0	NA	NA	0	0	0	0	0	NA	NA	NA	NA	NA	NA
112	M3	B	0	10	0	0	0	0	B	B2	0	17	3	0	0	NA	NA	NA	NA	NA	NA
113	M3	B	1	9	0	0	0	0	B	B2	0	4	1	0	15	1.059	1.142	0.691	1.239	1.303	2
116	M3	B	4	4	0	0	2	0	NA	NA	0	0	0	0	0	NA	NA	NA	NA	NA	NA
117	M3	B	0	8	2	0	0	0	B	B2	0	17	3	0	0	NA	NA	NA	NA	NA	NA
118	M3	B	3	6	1	0	0	0	NA	NA	0	0	0	0	0	NA	NA	NA	NA	NA	NA
119	M3	B	1	9	0	0	0	0	B	B2	0	7	2	0	11	NA	NA	NA	NA	NA	NA
120	M3	B	1	8	0	0	1	0	B	B2	0	17	3	0	0	1.089	1.138	0.69	1.306	2.444	2
121	M3	B	0	10	0	0	0	0	B	B2	0	17	2	0	1	1.148	1.186	0.694	1.312	2.462	2
122	M3	Q	1	2	0	0	7	0	N	N2	0	6	2	0	12	1.199	1.31	0.738	1.388	1.778	3
123	M3	Q	10	0	0	0	0	0	NA	NA	0	0	0	0	0	NA	NA	NA	NA	NA	NA
130	M3	Q	7	1	0	0	2	0	NA	NA	0	0	0	0	0	NA	NA	NA	NA	NA	NA
146	M3	E	10	0	0	0	0	0	O	D2	14	0	0	0	0	NA	NA	NA	NA	NA	NA
168	M4	E	1	0	0	0	9	0	N	N3	1	3	0	0	16	1.077	1.209	0.694	1.317	1.874	2
169	M4	E	7	0	1	0	2	0	O	D3	2	13	2	0	3	NA	NA	NA	NA	NA	NA
175	M4	E	0	1	1	0	8	0	N	N3	0	7	2	0	11	NA	NA	NA	NA	NA	NA
176	M4	E	2	0	1	0	7	0	NA	NA	0	0	0	0	0	NA	NA	NA	NA	NA	NA
178	M4	E	0	0	1	0	9	0	N	N3	1	4	4	0	11	NA	NA	NA	NA	NA	NA
182	M4	B	2	0	1	0	7	0	NA	NA	0	0	0	0	0	NA	NA	NA	NA	NA	NA
183	M4	B	6	0	1	0	3	0	O	D3	16	2	1	0	1	1.172	1.291	0.759	1.411	1.438	2
184	M4	B	6	0	0	0	4	0	O	D3	10	0	0	0	1	NA	NA	NA	NA	NA	NA
187	M4	B	0	0	2	0	8	0	N	N3	0	15	2	0	3	1.152	1.276	0.747	1.356	2.315	2
188	M4	B	3	1	1	0	5	0	B	B3	0	7	3	0	10	NA	NA	NA	NA	NA	NA
189	M4	B	0	1	1	0	8	0	N	N3	0	6	4	0	10	NA	NA	NA	NA	NA	NA
190	M4	B	0	0	0	0	10	0	N	N3	2	7	1	0	10	NA	NA	NA	NA	NA	NA
193	M4	B	0	4	1	0	5	0	B	B3	0	5	3	0	12	NA	NA	NA	NA	NA	NA
194	M4	Q	0	5	2	0	3	0	B	B3	0	11	5	0	4	NA	NA	NA	NA	NA	NA
195	M4	Q	1	1	1	0	7	0	NA	NA	0	0	0	0	0	NA	NA	NA	NA	NA	NA
197	M4	Q	1	0	0	0	9	0	N	N3	0	3	3	0	14	1.175	1.276	0.762	1.417	1.802	2
198	M4	Q	0	0	1	1	8	0	N	N3	4	0	0	0	3	NA	NA	NA	NA	NA	NA
201	M4	Q	3	1	1	0	5	0	B	B3	9	0	0	1	10	NA	NA	NA	NA	NA	NA
202	M4	Q	7	0	1	0	2	0	O	D3	9	0	0	1	0	NA	NA	NA	NA	NA	NA
204	M4	Q	0	6	3	0	1	0	B	B3	0	13	6	0	1	1.155	1.213	0.768	1.357	2.095	2
205	M4	Q	0	4	4	0	2	0	B	B3	0	11	9	0	0	NA	NA	NA	NA	NA	NA
213	M4	O	9	0	0	0	1	0	O	D3	20	0	0	0	0	1.099	1.206	0.724	1.365	1.963	2
218	M4	O	2	1	1	0	6	0	B	B3	2	2	0	0	16	1.136	1.276	0.78	1.426	2.098	2
219	M4	O	9	0	0	0	1	0	NA	NA	0	0	0	0	0	NA	NA	NA	NA	NA	NA
220	M4	O	10	0	0	0	0	0	O	D3	17	0	0	1	2	1.085	1.133	0.679	1.34	2.12	2
227	M11	O	5	0	0	0	5	0	NA	NA	0	0	0	0	0	NA	NA	NA	NA	NA	NA
228	M11	O	2	0	0	0	8	0	NA	NA	0	0	0	0	0	NA	NA	NA	NA	NA	NA
229	M11	O	3	0	0	1	6	0	N	N4	0	11	2	0	7	NA	NA	NA	NA	NA	NA
230	M11	O	10	0	0	0	0	0	O	D4	17	0	0	0	3	1.116	1.236	0.713	1.457	1.42	2
231	M11	O	6	0	0	0	4	0	NA	NA	0	0	0	0	0	NA	NA	NA	NA	NA	NA
232	M11	O	2	1	0	0	7	0	N	N4	0	17	0	0	3	NA	NA	NA	NA	NA	NA
233	M11	O	10	0	0	0	0	0	O	D4	13	0	0	0	1	NA	NA	NA	NA	NA	NA
235	M11	O	10	0	0	0	0	0	O	D4	18	0	0	1	1	1.055	1.219	0.722	1.328	1.316	2
236	M11	O	2	0	0	1	7	0	N	N4	0	9	0	0	11	NA	NA	NA	NA	NA	NA
237	M11	O	9	0	0	0	1	0	O	D4	4	10	1	0	5	1.169	1.298	0.834	1.457	1.933	4
238	M11	B	4	1	0	0	5	0	NA	NA	0	0	0	0	0	NA	NA	NA	NA	NA	NA
239	M11	B	0	4	0	0	6	0	N	N4	0	14	2	0	4	NA	NA	NA	NA	NA	NA
240	M11	B	5	0	0	0	5	0	NA	NA	0	0	0	0	0	NA	NA	NA	NA	NA	NA
241	M11	B	0	8	1	0	1	0	B	B4	0	13	5	0	2	1.074	1.236	0.662	1.305	2.108	2
243	M11	B	1	8	0	0	1	0	B	B4	1	16	1	0	2	1.104	1.191	0.729	1.363	2.024	3
246	M11	B	0	1	0	0	9	0	N	N4	0	5	1	0	14	1.169	1.237	0.719	1.347	2.048	2
247	M11	B	0	9	0	0	1	0	B	B4	0	15	3	0	2	1.059	1.183	0.684	1.248	2.212	2
248	M11	Q	1	5	0	0	4	0	NA	NA	0	0	0	0	0	NA	NA	NA	NA	NA	NA
249	M11	Q	0	6	0	0	4	0	NA	NA	0	0	0	0	0	NA	NA	NA	NA	NA	NA
250	M11	Q	3	0	0	2	5	0	N	N4	2	11	0	0	7	1.071	1.169	0.643	1.397	1.457	2
251	M11	Q	0	3	0	0	7	0	N	N4	1	1	0	0	18	NA	NA	NA	NA	NA	NA
252	M11	Q	0	5	0	0	5	0	N	N4	0	12	1	0	7	1.08	1.185	0.73	1.418	1.998	2
253	M11	Q	0	9	0	0	1	0	B	B4	0	13	4	0	3	1.131	1.163	0.735	1.336	2.114	2
254	M11	Q	9	0	0	0	1	0	O	D4	16	1	0	2	1	NA	NA	NA	NA	NA	NA
258	M11	Q	0	9	1	0	0	0	B	B4	0	8	6	0	6	1.075	1.221	0.675	1.29	1.761	2
259	M11	Q	0	9	1	0	0	0	B	B4	0	13	3	0	4	1.096	1.216	0.702	1.398	1.95	3
260	M11	E	10	0	0	0	0	0	NA	NA	0	0	0	0	0	NA	NA	NA	NA	NA	NA
261	M11	E	9	0	0	0	1	0	NA	NA	0	0	0	0	0	NA	NA	NA	NA	NA	NA
262	M11	E	9	0	0	1	0	0	NA	NA	0	0	0	0	0	NA	NA	NA	NA	NA	NA
263	M11	E	10	0	0	0	0	0	O	D4	18	1	0	0	1	1.186	1.286	0.741	1.45	2.013	2
274	M11	E	10	0	0	0	0	0	NA	NA	0	0	0	0	0	NA	NA	NA	NA	NA	NA
284	M12	O	9	0	0	0	1	0	O	D5	0	0	0	0	2	NA	NA	NA	NA	NA	NA
295	M12	O	4	0	0	1	5	0	N	N5	0	6	0	0	14	NA	NA	NA	NA	NA	NA
298	M12	B	0	3	7	0	0	0	B	B5	0	16	3	0	1	NA	NA	NA	NA	NA	NA
299	M12	B	0	4	4	0	2	0	B	B5	0	9	3	0	8	1.151	1.216	0.733	1.312	1.85	2
301	M12	B	0	3	3	0	4	0	B	B5	0	14	4	0	2	NA	NA	NA	NA	NA	NA
304	M12	B	0	2	3	0	5	0	N	N5	0	18	2	0	0	1.068	1.183	0.693	1.225	1.4	2
309	M12	Q	7	0	0	0	3	0	NA	NA	0	0	0	0	0	NA	NA	NA	NA	NA	NA
310	M12	Q	9	0	0	0	1	0	O	D5	16	0	0	0	4	NA	NA	NA	NA	NA	NA
314	M12	Q	4	0	0	1	5	0	N	N5	0	1	0	0	19	1.119	1.236	0.711	1.318	1.701	2
315	M12	Q	0	1	2	0	7	0	N	N5	0	16	1	0	3	NA	NA	NA	NA	NA	NA
317	M12	Q	0	0	8	0	2	0	B	B5	0	9	3	0	8	NA	NA	NA	NA	NA	NA
331	M12	E	9	0	0	0	1	0	O	D5	0	13	4	0	3	1.155	1.259	0.727	1.395	1.012	2
335	M12	E	10	0	0	0	0	0	O	D5	4	0	0	1	15	1.152	1.245	0.73	1.323	1.7	2
337	M13	O	0	0	0	0	10	0	N	N6	0	2	0	0	18	NA	NA	NA	NA	NA	NA
338	M13	O	3	0	0	1	6	0	NA	NA	0	0	0	0	0	NA	NA	NA	NA	NA	NA
339	M13	O	5	0	0	0	5	0	NA	NA	0	0	0	0	0	NA	NA	NA	NA	NA	NA
340	M13	O	5	0	0	0	5	0	NA	NA	0	0	0	0	0	NA	NA	NA	NA	NA	NA
341	M13	O	7	0	0	1	2	0	O	D6	12	0	0	1	7	1.079	1.148	0.697	1.418	2.09	2
343	M13	O	3	1	0	1	5	0	NA	NA	0	0	0	0	0	NA	NA	NA	NA	NA	NA
345	M13	O	0	9	0	0	1	0	B	B6	0	12	4	0	4	1.122	1.262	0.741	1.426	2.624	2
346	M13	O	0	4	1	0	5	0	B	B6	0	15	2	0	3	1.102	1.205	0.723	1.294	1.675	2
347	M13	B	5	0	1	1	3	0	O	D6	11	0	0	0	1	NA	NA	NA	NA	NA	NA
348	M13	B	6	0	0	1	3	0	O	D6	18	0	0	0	2	NA	NA	NA	NA	NA	NA
349	M13	B	0	4	0	0	6	0	NA	NA	0	0	0	0	0	NA	NA	NA	NA	NA	NA
350	M13	B	0	3	0	0	7	0	N	N6	0	14	1	0	5	NA	NA	NA	NA	NA	NA
351	M13	B	0	7	0	0	3	0	B	B6	0	13	1	0	6	NA	NA	NA	NA	NA	NA
352	M13	B	0	3	0	0	7	0	N	N6	0	9	0	0	11	1.145	1.266	0.755	1.384	1.864	4
353	M13	B	0	6	1	0	3	0	B	B6	0	10	1	0	9	1.121	1.197	0.768	1.396	1.982	3
354	M13	B	0	9	1	0	0	0	B	B6	0	16	1	0	3	NA	NA	NA	NA	NA	NA
355	M13	B	0	7	0	0	3	0	B	B6	0	3	4	0	13	NA	NA	NA	NA	NA	NA
356	M13	B	0	6	1	0	3	0	B	B6	0	12	1	0	7	NA	NA	NA	NA	NA	NA
357	M13	Q	0	2	0	0	8	0	N	N6	0	13	1	0	6	1.145	1.205	0.749	1.345	2.1	4
358	M13	Q	0	2	0	1	7	0	N	N6	1	1	0	0	18	NA	NA	NA	NA	NA	NA
359	M13	Q	9	0	0	0	1	0	NA	NA	0	0	0	0	0	NA	NA	NA	NA	NA	NA
360	M13	Q	0	0	0	1	9	0	N	N6	0	1	0	1	18	1.164	1.209	0.763	1.436	1.802	6
361	M13	Q	0	2	1	0	7	0	N	N6	0	9	2	0	9	NA	NA	NA	NA	NA	NA
362	M13	Q	4	1	0	0	5	0	NA	NA	0	0	0	0	0	NA	NA	NA	NA	NA	NA
363	M13	Q	0	5	2	0	3	0	B	B6	0	12	1	0	7	1.118	1.17	0.749	1.415	2.074	2
364	M13	Q	0	2	0	0	8	0	N	N6	0	4	3	0	13	1.125	1.251	0.738	1.324	1.669	4
365	M13	Q	0	4	3	0	3	0	B	B6	0	15	3	0	2	NA	NA	NA	NA	NA	NA
366	M13	Q	0	3	2	0	5	0	B	B6	0	7	2	0	11	NA	NA	NA	NA	NA	NA
369	M13	E	9	0	0	0	1	0	O	D6	4	3	1	2	10	NA	NA	NA	NA	NA	NA
370	M13	E	7	0	0	2	1	0	O	D6	7	0	0	0	0	NA	NA	NA	NA	NA	NA
371	M13	E	8	0	0	1	1	0	O	D6	11	2	1	2	4	1.171	1.261	0.764	1.46	2.331	2
372	M13	E	2	1	0	3	4	0	N	N6	18	0	0	0	2	NA	NA	NA	NA	NA	NA
378	M13	E	8	0	0	1	1	0	O	D6	16	0	0	0	4	NA	NA	NA	NA	NA	NA
379	M13	E	2	1	0	0	7	0	NA	NA	0	0	0	0	0	NA	NA	NA	NA	NA	NA
380	M13	E	4	0	0	3	3	0	NA	NA	0	0	0	0	0	NA	NA	NA	NA	NA	NA
383	M14	O	9	0	0	0	1	0	NA	NA	0	0	0	0	0	NA	NA	NA	NA	NA	NA
384	M14	O	10	0	0	0	0	0	O	D7	10	0	0	0	0	NA	NA	NA	NA	NA	NA
386	M14	O	0	1	0	0	9	0	N	N7	1	13	0	0	6	1.09	1.236	0.742	1.373	1.944	2
387	M14	O	10	0	0	0	0	0	O	D7	2	10	0	0	8	1.125	1.219	0.74	1.389	1.461	4
388	M14	O	10	0	0	0	0	0	O	D7	15	0	0	0	5	NA	NA	NA	NA	NA	NA
391	M14	O	10	0	0	0	0	0	O	D7	2	0	0	0	0	NA	NA	NA	NA	NA	NA
393	M14	O	10	0	0	0	0	0	O	D7	20	0	0	0	0	1.154	1.245	0.743	1.431	1.489	2
395	M14	O	10	0	0	0	0	0	O	D7	20	0	0	0	0	1.155	1.258	0.752	1.412	1.852	2
396	M14	B	2	2	0	0	6	0	N	N7	0	16	0	0	4	1.111	1.192	0.717	1.335	2.272	2
397	M14	B	7	0	0	0	3	0	NA	NA	0	0	0	0	0	NA	NA	NA	NA	NA	NA
398	M14	B	7	0	0	0	3	0	NA	NA	0	0	0	0	0	NA	NA	NA	NA	NA	NA
402	M14	B	0	3	0	0	7	0	B	B7	0	8	0	0	12	NA	NA	NA	NA	NA	NA
404	M14	B	9	0	0	0	1	0	NA	NA	0	0	0	0	0	NA	NA	NA	NA	NA	NA
407	M14	B	1	9	0	0	0	0	B	B7	1	16	1	0	2	1.161	1.239	0.78	1.473	2.056	2
408	M14	B	0	4	0	0	6	0	B	B7	0	18	0	0	2	NA	NA	NA	NA	NA	NA
409	M14	Q	8	0	0	1	1	0	NA	NA	0	0	0	0	0	NA	NA	NA	NA	NA	NA
411	M14	Q	0	9	0	0	1	0	B	B7	2	12	0	0	6	1.115	1.232	0.718	1.307	2.307	2
412	M14	Q	3	1	0	0	6	0	N	N7	7	0	0	6	7	0.966	1.066	0.635	1.256	1.686	2
413	M14	Q	10	0	0	0	0	0	NA	NA	0	0	0	0	0	NA	NA	NA	NA	NA	NA
416	M14	Q	0	8	0	0	2	0	B	B7	0	16	0	0	4	NA	NA	NA	NA	NA	NA
418	M14	Q	0	6	0	0	4	0	B	B7	4	10	0	0	6	1.129	1.251	0.761	1.362	1.649	2
419	M14	Q	0	6	2	0	2	0	B	B7	1	15	1	0	3	1.13	1.239	0.73	1.398	1.882	2
426	M14	E	10	0	0	0	0	0	NA	NA	0	0	0	0	0	NA	NA	NA	NA	NA	NA
427	M14	E	5	0	0	0	5	0	N	N7	0	2	0	0	18	1.049	1.172	0.679	1.312	1.425	2
428	M14	E	9	0	0	0	1	0	NA	NA	0	0	0	0	0	NA	NA	NA	NA	NA	NA
429	M14	E	9	0	0	0	1	0	NA	NA	0	0	0	0	0	NA	NA	NA	NA	NA	NA
433	M14	E	7	0	0	0	3	0	NA	NA	0	0	0	0	0	NA	NA	NA	NA	NA	NA
445	M15	O	0	3	0	0	7	0	N	N8	0	10	4	0	6	1.06	1.167	0.688	1.388	2.409	1
446	M15	O	5	0	0	0	5	0	O	D8	7	0	0	0	0	NA	NA	NA	NA	NA	NA
449	M15	O	0	4	0	0	6	0	NA	NA	0	0	0	0	0	NA	NA	NA	NA	NA	NA
450	M15	O	0	1	0	0	9	0	N	N8	0	5	3	0	12	NA	NA	NA	NA	NA	NA
451	M15	O	4	0	0	0	6	0	O	D8	3	6	1	0	10	1.04	1.143	0.696	1.264	0.989	2
452	M15	O	0	3	0	0	7	0	N	N8	0	0	0	0	20	NA	NA	NA	NA	NA	NA
453	M15	O	5	1	0	0	4	0	O	D8	13	0	0	0	1	NA	NA	NA	NA	NA	NA
455	M15	O	0	2	0	0	8	0	N	N8	1	5	0	0	14	NA	NA	NA	NA	NA	NA
457	M15	B	0	3	0	0	7	0	N	N8	0	13	3	0	4	NA	NA	NA	NA	NA	NA
458	M15	B	0	1	0	0	9	0	N	N8	0	10	2	0	8	1.116	1.225	0.71	1.348	1.537	2
459	M15	B	2	1	0	1	6	0	NA	NA	0	0	0	0	0	NA	NA	NA	NA	NA	NA
461	M15	B	0	5	0	0	5	0	NA	NA	0	0	0	0	0	NA	NA	NA	NA	NA	NA
462	M15	B	0	3	0	0	7	0	N	N8	0	6	4	0	10	NA	NA	NA	NA	NA	NA
463	M15	B	0	8	1	0	1	0	B	B8	0	18	2	0	0	1.076	1.099	0.666	1.378	2.553	2
465	M15	B	4	0	0	0	6	0	O	D8	2	0	0	0	0	NA	NA	NA	NA	NA	NA
468	M15	Q	0	6	0	0	4	0	B	B8	0	9	5	0	6	0.971	0.959	0.604	1.233	1.747	2
470	M15	Q	5	1	0	1	3	0	O	D8	6	0	0	0	5	NA	NA	NA	NA	NA	NA
472	M15	Q	4	0	0	1	5	0	O	D8	15	1	0	0	4	1.088	1.197	0.68	1.3	1.252	2
473	M15	Q	0	5	0	0	5	0	NA	NA	0	0	0	0	0	NA	NA	NA	NA	NA	NA
474	M15	Q	0	5	3	0	2	0	B	B8	0	14	4	0	2	1.071	1.091	0.657	1.33	2.363	2
475	M15	Q	0	0	0	0	10	0	N	N8	0	0	2	0	18	NA	NA	NA	NA	NA	NA
476	M15	Q	0	8	2	0	0	0	B	B8	0	11	3	0	6	1.079	1.176	0.68	1.366	2.081	4
477	M15	Q	0	8	0	0	2	0	B	B8	1	11	2	0	6	0.95	0.952	0.593	1.175	1.99	2
479	M15	E	9	0	0	1	0	0	O	D8	13	0	0	0	4	NA	NA	NA	NA	NA	NA
480	M15	E	7	0	0	0	3	0	O	D8	18	0	0	0	2	1.021	1.138	0.673	1.212	1.509	2
481	M15	E	2	0	0	0	8	0	N	N8	0	3	1	0	16	0.986	1.028	0.657	1.142	1.186	2
485	M15	E	0	3	2	0	5	0	NA	NA	0	0	0	0	0	NA	NA	NA	NA	NA	NA
486	M15	E	0	6	0	0	4	0	NA	NA	0	0	0	0	0	NA	NA	NA	NA	NA	NA
487	M15	E	6	0	0	3	1	0	O	D8	19	0	0	1	0	NA	NA	NA	NA	NA	NA
490	M16	O	10	0	0	0	0	0	NA	NA	0	0	0	0	0	NA	NA	NA	NA	NA	NA
491	M16	O	10	0	0	0	0	0	O	D9	1	0	0	0	1	NA	NA	NA	NA	NA	NA
496	M16	O	10	0	0	0	0	0	NA	NA	0	0	0	0	0	NA	NA	NA	NA	NA	NA
497	M16	O	5	4	0	0	1	0	N	N9	2	0	0	0	0	NA	NA	NA	NA	NA	NA
499	M16	O	9	0	0	0	1	0	O	D9	8	0	0	0	1	1.248	1.121	0.683	1.421	2.101	2
500	M16	O	10	0	0	0	0	0	O	D9	5	0	0	0	0	NA	NA	NA	NA	NA	NA
503	M16	O	8	0	0	0	2	0	NA	NA	0	0	0	0	0	NA	NA	NA	NA	NA	NA
506	M16	B	6	2	0	0	2	0	NA	NA	0	0	0	0	0	NA	NA	NA	NA	NA	NA
507	M16	B	10	0	0	0	0	0	O	D9	5	2	0	0	2	1.183	1.286	0.755	1.485	1.911	2
509	M16	B	8	0	0	0	2	0	NA	NA	0	0	0	0	0	NA	NA	NA	NA	NA	NA
510	M16	B	1	7	0	0	2	0	B	B9	2	7	1	0	10	NA	NA	NA	NA	NA	NA
511	M16	B	0	8	0	0	2	0	B	B9	0	11	4	0	5	NA	NA	NA	NA	NA	NA
512	M16	B	1	8	0	0	1	0	B	B9	0	5	6	0	9	1.064	1.18	0.696	1.317	2.218	2
513	M16	B	4	4	0	0	2	0	N	N9	1	12	1	0	6	1.077	1.152	0.677	1.334	1.307	2
518	M16	Q	6	1	0	0	3	0	N	N9	0	0	0	0	10	NA	NA	NA	NA	NA	NA
520	M16	Q	0	6	1	0	3	0	B	B9	0	9	2	0	9	1.11	1.189	0.76	1.258	1.735	2
521	M16	Q	5	3	0	0	2	0	NA	NA	0	0	0	0	0	NA	NA	NA	NA	NA	NA
522	M16	Q	5	2	0	0	3	0	N	N9	6	0	0	0	2	NA	NA	NA	NA	NA	NA
524	M16	Q	0	8	2	0	0	0	B	B9	0	13	3	0	4	NA	NA	NA	NA	NA	NA
525	M16	Q	0	3	4	0	3	0	B	B9	0	8	4	0	8	NA	NA	NA	NA	NA	NA
526	M16	Q	0	10	0	0	0	0	B	B9	0	7	4	0	9	NA	NA	NA	NA	NA	NA
527	M16	Q	1	8	0	0	1	0	B	B9	0	9	5	0	6	0.98	1.04	0.635	1.221	1.798	2
531	M16	E	10	0	0	0	0	0	O	D9	2	0	0	0	0	NA	NA	NA	NA	NA	NA
536	M16	E	9	0	0	0	1	0	O	D9	2	0	0	0	0	NA	NA	NA	NA	NA	NA
546	M16	E	9	0	0	1	0	0	NA	NA	0	0	0	0	0	NA	NA	NA	NA	NA	NA
547	M16	E	10	0	0	0	0	0	NA	NA	0	0	0	0	0	NA	NA	NA	NA	NA	NA
612	M20	O	10	0	0	0	0	0	O	D10	19	0	0	0	1	1.148	1.225	0.769	1.432	2.54	2
623	M20	O	10	0	0	0	0	0	O	D10	5	6	1	0	8	NA	NA	NA	NA	NA	NA
625	M20	B	4	3	2	0	1	0	B	B10	0	2	0	0	18	1.068	1.193	0.705	1.308	1.603	NA
626	M20	B	10	0	0	0	0	0	O	D10	16	0	0	0	4	1.068	1.188	0.703	1.407	1.783	2
630	M20	B	10	0	0	0	0	0	O	D10	19	0	0	1	0	NA	NA	NA	NA	NA	NA
633	M20	B	6	0	1	0	3	0	NA	NA	0	0	0	0	0	NA	NA	NA	NA	NA	NA
634	M20	B	0	2	0	0	8	0	N	N10	0	19	1	0	0	1.116	1.237	0.696	1.368	1.937	2
635	M20	B	1	3	5	0	1	0	B	B10	0	8	3	0	9	1.223	1.303	0.828	1.578	2.265	NA
636	M20	Q	10	0	0	0	0	0	NA	NA	0	0	0	0	0	NA	NA	NA	NA	NA	NA
637	M20	Q	7	0	0	0	3	0	NA	NA	0	0	0	0	0	NA	NA	NA	NA	NA	NA
638	M20	Q	8	0	0	1	1	0	NA	NA	0	0	0	0	0	NA	NA	NA	NA	NA	NA
642	M20	Q	6	1	0	0	3	0	NA	NA	0	0	0	0	0	NA	NA	NA	NA	NA	NA
651	M20	E	10	0	0	0	0	0	NA	NA	0	0	0	0	0	NA	NA	NA	NA	NA	NA
656	M20	E	9	0	0	1	0	0	NA	NA	0	0	0	0	0	NA	NA	NA	NA	NA	NA
657	M20	E	9	0	0	1	0	0	NA	NA	0	0	0	0	0	NA	NA	NA	NA	NA	NA
658	M20	E	10	0	0	0	0	0	O	D10	13	1	0	2	4	NA	NA	NA	NA	NA	NA
659	M20	E	7	0	0	2	1	0	NA	NA	0	0	0	0	0	NA	NA	NA	NA	NA	NA
2	M2	O	8	0	0	0	1	0	NA	NA	0	0	0	0	0	NA	NA	NA	NA	NA	NA
4	M2	O	9	0	0	0	0	0	NA	NA	0	0	0	0	0	NA	NA	NA	NA	NA	NA
5	M2	O	9	0	0	0	0	0	O	D1	8	1	0	1	1	NA	NA	NA	NA	NA	NA
28	M2	B	7	0	0	0	2	0	NA	NA	0	0	0	0	0	NA	NA	NA	NA	NA	NA
49	M2	Q	1	4	2	0	2	0	NA	NA	0	0	0	0	0	NA	NA	NA	NA	NA	NA
72	M2	E	8	0	0	0	1	0	NA	NA	0	0	0	0	0	NA	NA	NA	NA	NA	NA
124	M3	Q	8	0	0	0	1	0	O	D2	3	0	0	0	0	NA	NA	NA	NA	NA	NA
133	M3	Q	1	4	3	0	1	0	B	B2	0	16	2	0	2	NA	NA	NA	NA	NA	NA
134	M3	Q	0	8	1	0	0	0	B	B2	0	12	7	0	1	1.013	1.146	0.682	1.315	2.028	2
177	M4	E	3	0	0	0	6	0	NA	NA	0	0	0	0	0	NA	NA	NA	NA	NA	NA
181	M4	E	0	1	3	0	5	0	B	B3	0	15	5	0	0	NA	NA	NA	NA	NA	NA
186	M4	B	0	2	2	0	5	0	B	B3	0	13	5	0	2	1.113	1.216	0.696	1.339	1.949	2
196	M4	Q	0	2	3	0	4	0	B	B3	2	7	2	0	9	1.145	1.243	0.745	1.321	1.875	2
242	M11	B	0	6	0	0	3	0	B	B4	0	8	0	0	12	1.091	1.206	0.725	1.432	2.033	2
244	M11	B	0	7	1	0	1	0	B	B4	0	12	4	0	4	1.096	1.208	0.694	1.382	2.334	2
245	M11	B	0	8	0	0	1	0	B	B4	2	13	1	0	4	1.069	1.178	0.719	1.381	2.197	2
267	M11	E	8	0	0	1	0	0	O	D4	7	4	0	1	8	NA	NA	NA	NA	NA	NA
281	M12	O	8	0	0	0	1	0	NA	NA	0	0	0	0	0	NA	NA	NA	NA	NA	NA
282	M12	O	9	0	0	0	0	0	O	D5	8	1	0	0	5	NA	NA	NA	NA	NA	NA
287	M12	O	9	0	0	0	0	0	O	D5	9	1	0	3	7	1.13	1.213	0.719	1.374	1.605	2
293	M12	O	9	0	0	0	0	0	O	D5	11	0	0	0	1	NA	NA	NA	NA	NA	NA
296	M12	O	2	0	0	0	7	0	N	N5	0	14	2	0	4	1.195	1.304	0.779	1.427	1.822	2
300	M12	B	0	4	2	0	3	0	B	B5	0	13	0	0	7	1.152	1.231	0.713	1.39	1.662	3
302	M12	B	3	1	0	0	5	0	N	N5	0	4	0	0	16	NA	NA	NA	NA	NA	NA
305	M12	B	0	2	1	0	6	0	N	N5	0	13	2	0	5	1.137	1.213	0.731	1.333	2.1	2
308	M12	Q	9	0	0	0	0	0	NA	NA	0	0	0	0	0	NA	NA	NA	NA	NA	NA
320	M12	Q	0	1	6	0	2	0	B	B5	0	15	0	0	5	NA	NA	NA	NA	NA	NA
324	M12	E	6	0	0	0	3	0	NA	NA	0	0	0	0	0	NA	NA	NA	NA	NA	NA
332	M12	E	9	0	0	0	0	0	NA	NA	0	0	0	0	0	NA	NA	NA	NA	NA	NA
336	M12	E	9	0	0	0	0	0	NA	NA	0	0	0	0	0	NA	NA	NA	NA	NA	NA
342	M13	O	5	0	0	1	3	0	O	D6	10	5	0	0	5	1.023	1.317	0.795	1.473	1.785	14
394	M14	O	9	0	0	0	0	0	O	D7	16	0	0	0	4	NA	NA	NA	NA	NA	NA
400	M14	B	3	2	0	0	4	0	B	B7	0	0	0	0	2	NA	NA	NA	NA	NA	NA
403	M14	B	6	0	0	0	3	0	NA	NA	0	0	0	0	0	NA	NA	NA	NA	NA	NA
410	M14	Q	9	0	0	0	0	0	O	D7	19	0	0	0	1	NA	NA	NA	NA	NA	NA
417	M14	Q	0	4	0	0	5	0	B	B7	3	8	0	0	9	NA	NA	NA	NA	NA	NA
435	M14	E	8	0	0	0	1	0	NA	NA	0	0	0	0	0	NA	NA	NA	NA	NA	NA
444	M15	O	3	1	0	0	5	0	NA	NA	0	0	0	0	0	NA	NA	NA	NA	NA	NA
456	M15	O	0	6	0	0	3	0	B	B8	0	3	0	0	17	1.027	1.159	0.696	1.474	2.072	2
460	M15	B	0	7	1	0	1	0	B	B8	1	12	4	0	3	1.011	1.128	0.648	1.372	2.308	2
467	M15	B	0	7	0	0	2	0	B	B8	0	9	1	0	10	0.917	1.012	0.586	1.132	1.892	2
469	M15	Q	1	5	0	0	3	0	NA	NA	0	0	0	0	0	NA	NA	NA	NA	NA	NA
478	M15	Q	0	8	0	0	1	0	B	B8	0	5	0	0	15	0.928	0.959	0.584	1.156	1.484	2
482	M15	E	0	2	0	0	7	0	NA	NA	0	0	0	0	0	NA	NA	NA	NA	NA	NA
488	M15	E	0	4	0	0	5	0	NA	NA	0	0	0	0	0	NA	NA	NA	NA	NA	NA
489	M15	E	0	0	0	0	9	0	N	N8	0	16	1	0	3	0.988	1.051	0.638	1.193	1.179	2
495	M16	O	9	0	0	0	0	0	NA	NA	0	0	0	0	0	NA	NA	NA	NA	NA	NA
502	M16	O	9	0	0	0	0	0	NA	NA	0	0	0	0	0	NA	NA	NA	NA	NA	NA
508	M16	B	1	6	0	0	2	0	B	B9	0	10	4	0	6	1.039	1.131	0.678	1.294	1.787	2
514	M16	B	2	2	0	0	5	0	N	N9	1	0	1	0	7	NA	NA	NA	NA	NA	NA
517	M16	Q	0	8	1	0	0	0	B	B9	0	13	0	0	7	NA	NA	NA	NA	NA	NA
535	M16	E	9	0	0	0	0	0	O	D9	8	0	0	0	1	1.125	1.251	0.747	1.298	1.417	2
540	M16	E	7	0	0	1	1	0	NA	NA	0	0	0	0	0	NA	NA	NA	NA	NA	NA
610	M20	O	9	0	0	0	0	0	O	D10	12	2	0	1	5	1.152	1.264	0.745	1.463	1.356	2
611	M20	O	9	0	0	0	0	0	O	D10	7	8	2	0	3	NA	NA	NA	NA	NA	NA
615	M20	O	9	0	0	0	0	0	NA	NA	0	0	0	0	0	NA	NA	NA	NA	NA	NA
617	M20	O	9	0	0	0	0	0	O	D10	5	11	1	0	3	NA	NA	NA	NA	NA	NA
647	M20	E	9	0	0	0	0	0	NA	NA	0	0	0	0	0	NA	NA	NA	NA	NA	NA
648	M20	E	8	0	0	1	0	0	NA	NA	0	0	0	0	0	NA	NA	NA	NA	NA	NA
655	M20	E	8	0	0	1	0	0	NA	NA	0	0	0	0	0	NA	NA	NA	NA	NA	NA
29	M2	B	0	5	0	0	3	0	NA	NA	0	0	0	0	0	NA	NA	NA	NA	NA	NA
56	M2	Q	2	3	1	0	2	0	NA	NA	0	0	0	0	0	NA	NA	NA	NA	NA	NA
77	M2	E	8	0	0	0	0	0	NA	NA	0	0	0	0	0	NA	NA	NA	NA	NA	NA
153	M3	E	5	0	0	1	2	0	N	N2	7	1	2	0	10	1.075	1.148	0.702	1.297	1.732	2
170	M4	E	0	2	0	0	6	0	NA	NA	0	0	0	0	0	NA	NA	NA	NA	NA	NA
180	M4	E	8	0	0	0	0	0	O	D3	16	0	0	0	4	1.124	1.228	0.744	1.454	2.019	2
200	M4	Q	4	0	0	1	3	0	NA	NA	0	0	0	0	0	NA	NA	NA	NA	NA	NA
297	M12	B	8	0	0	0	0	0	NA	NA	0	0	0	0	0	NA	NA	NA	NA	NA	NA
329	M12	E	8	0	0	0	0	0	NA	NA	0	0	0	0	0	NA	NA	NA	NA	NA	NA
344	M13	O	2	0	0	1	5	0	NA	NA	0	0	0	0	0	NA	NA	NA	NA	NA	NA
368	M13	E	7	0	0	0	1	0	O	D6	17	0	0	2	1	NA	NA	NA	NA	NA	NA
390	M14	O	8	0	0	0	0	0	O	D7	16	1	0	0	3	1.185	1.192	0.8	1.461	2.032	2
423	M14	E	7	0	0	1	0	0	NA	NA	0	0	0	0	0	NA	NA	NA	NA	NA	NA
464	M15	B	0	4	1	0	3	0	B	B8	0	2	1	0	17	0.899	0.895	0.539	1.244	1.477	2
516	M16	Q	8	0	0	0	0	0	NA	NA	0	0	0	0	0	NA	NA	NA	NA	NA	NA
560	M17	O	0	1	0	0	7	0	NA	NA	0	0	0	0	0	NA	NA	NA	NA	NA	NA
561	M17	O	7	0	0	1	0	0	NA	NA	0	0	0	0	0	NA	NA	NA	NA	NA	NA
562	M17	O	5	0	0	0	3	0	NA	NA	0	0	0	0	0	NA	NA	NA	NA	NA	NA
563	M17	O	1	0	0	0	7	0	NA	NA	0	0	0	0	0	NA	NA	NA	NA	NA	NA
564	M17	O	0	1	1	0	6	0	NA	NA	0	0	0	0	0	NA	NA	NA	NA	NA	NA
565	M17	O	1	2	0	0	5	0	NA	NA	0	0	0	0	0	NA	NA	NA	NA	NA	NA
568	M17	O	2	2	0	0	4	0	NA	NA	0	0	0	0	0	NA	NA	NA	NA	NA	NA
569	M17	B	1	0	0	1	6	0	NA	NA	0	0	0	0	0	NA	NA	NA	NA	NA	NA
571	M17	B	0	0	0	0	8	0	NA	NA	0	0	0	0	0	NA	NA	NA	NA	NA	NA
572	M17	B	1	1	1	0	5	0	NA	NA	0	0	0	0	0	NA	NA	NA	NA	NA	NA
573	M17	B	0	3	0	0	5	0	NA	NA	0	0	0	0	0	NA	NA	NA	NA	NA	NA
574	M17	B	0	4	0	0	4	0	NA	NA	0	0	0	0	0	NA	NA	NA	NA	NA	NA
579	M17	B	1	3	1	0	3	0	NA	NA	0	0	0	0	0	NA	NA	NA	NA	NA	NA
581	M17	Q	1	0	2	0	5	0	NA	NA	0	0	0	0	0	NA	NA	NA	NA	NA	NA
582	M17	Q	0	1	0	0	7	0	NA	NA	0	0	0	0	0	NA	NA	NA	NA	NA	NA
584	M17	Q	0	0	3	0	5	0	NA	NA	0	0	0	0	0	NA	NA	NA	NA	NA	NA
585	M17	Q	1	1	1	0	5	0	NA	NA	0	0	0	0	0	NA	NA	NA	NA	NA	NA
586	M17	Q	0	1	3	1	3	0	NA	NA	0	0	0	0	0	NA	NA	NA	NA	NA	NA
587	M17	Q	6	1	0	0	1	0	NA	NA	0	0	0	0	0	NA	NA	NA	NA	NA	NA
588	M17	Q	3	0	0	2	3	0	NA	NA	0	0	0	0	0	NA	NA	NA	NA	NA	NA
589	M17	Q	0	3	5	0	0	0	NA	NA	0	0	0	0	0	NA	NA	NA	NA	NA	NA
590	M17	Q	0	1	3	0	4	0	NA	NA	0	0	0	0	0	NA	NA	NA	NA	NA	NA
593	M17	E	8	0	0	0	0	0	NA	NA	0	0	0	0	0	NA	NA	NA	NA	NA	NA
600	M17	E	8	0	0	0	0	0	NA	NA	0	0	0	0	0	NA	NA	NA	NA	NA	NA
604	M17	E	8	0	0	0	0	0	NA	NA	0	0	0	0	0	NA	NA	NA	NA	NA	NA
632	M20	B	4	0	0	0	4	0	NA	NA	0	0	0	0	0	NA	NA	NA	NA	NA	NA
653	M20	E	7	0	0	1	0	0	NA	NA	0	0	0	0	0	NA	NA	NA	NA	NA	NA
66	M2	E	6	0	0	0	1	0	NA	NA	0	0	0	0	0	NA	NA	NA	NA	NA	NA
79	M2	E	5	0	0	1	1	0	NA	NA	0	0	0	0	0	NA	NA	NA	NA	NA	NA
81	M2	E	7	0	0	0	0	0	NA	NA	0	0	0	0	0	NA	NA	NA	NA	NA	NA
91	M3	O	7	0	0	0	0	0	O	D2	2	0	0	0	0	NA	NA	NA	NA	NA	NA
98	M3	O	7	0	0	0	0	0	O	D2	9	3	0	0	8	1.02	1.116	0.693	1.201	1.507	2
144	M3	E	7	0	0	0	0	0	NA	NA	0	0	0	0	0	NA	NA	NA	NA	NA	NA
149	M3	E	6	0	0	1	0	0	NA	NA	0	0	0	0	0	NA	NA	NA	NA	NA	NA
150	M3	E	5	0	0	0	2	0	NA	NA	0	0	0	0	0	NA	NA	NA	NA	NA	NA
217	M4	O	7	0	0	0	0	0	NA	NA	0	0	0	0	0	NA	NA	NA	NA	NA	NA
318	M12	Q	0	3	3	0	1	0	NA	NA	0	0	0	0	0	NA	NA	NA	NA	NA	NA
414	M14	Q	5	0	0	0	2	0	NA	NA	0	0	0	0	0	NA	NA	NA	NA	NA	NA
541	M16	E	7	0	0	0	0	0	NA	NA	0	0	0	0	0	NA	NA	NA	NA	NA	NA
543	M16	E	6	0	0	1	0	0	NA	NA	0	0	0	0	0	NA	NA	NA	NA	NA	NA
558	M17	O	0	1	2	0	4	0	NA	NA	0	0	0	0	0	NA	NA	NA	NA	NA	NA
559	M17	O	6	0	0	0	1	0	NA	NA	0	0	0	0	0	NA	NA	NA	NA	NA	NA
570	M17	B	3	0	0	1	3	0	NA	NA	0	0	0	0	0	NA	NA	NA	NA	NA	NA
578	M17	B	0	4	0	0	3	0	NA	NA	0	0	0	0	0	NA	NA	NA	NA	NA	NA
580	M17	B	0	1	0	2	4	0	NA	NA	0	0	0	0	0	NA	NA	NA	NA	NA	NA
594	M17	E	6	0	0	0	1	0	NA	NA	0	0	0	0	0	NA	NA	NA	NA	NA	NA
603	M17	E	5	0	0	1	1	0	NA	NA	0	0	0	0	0	NA	NA	NA	NA	NA	NA
628	M20	B	6	0	0	0	1	0	NA	NA	0	0	0	0	0	NA	NA	NA	NA	NA	NA
7	M2	O	6	0	0	0	0	0	NA	NA	0	0	0	0	0	NA	NA	NA	NA	NA	NA
9	M2	O	6	0	0	0	0	0	NA	NA	0	0	0	0	0	NA	NA	NA	NA	NA	NA
48	M2	Q	0	5	1	0	0	0	B	B1	0	13	4	0	3	NA	NA	NA	NA	NA	NA
55	M2	Q	0	5	1	0	0	0	B	B1	0	16	3	0	1	NA	NA	NA	NA	NA	NA
62	M2	E	6	0	0	0	0	0	NA	NA	0	0	0	0	0	NA	NA	NA	NA	NA	NA
70	M2	E	6	0	0	0	0	0	NA	NA	0	0	0	0	0	NA	NA	NA	NA	NA	NA
73	M2	E	5	0	0	0	1	0	NA	NA	0	0	0	0	0	NA	NA	NA	NA	NA	NA
96	M3	O	6	0	0	0	0	0	NA	NA	0	0	0	0	0	NA	NA	NA	NA	NA	NA
101	M3	O	6	0	0	0	0	0	NA	NA	0	0	0	0	0	NA	NA	NA	NA	NA	NA
105	M3	O	6	0	0	0	0	0	NA	NA	0	0	0	0	0	NA	NA	NA	NA	NA	NA
107	M3	O	6	0	0	0	0	0	NA	NA	0	0	0	0	0	NA	NA	NA	NA	NA	NA
110	M3	O	6	0	0	0	0	0	NA	NA	0	0	0	0	0	NA	NA	NA	NA	NA	NA
115	M3	B	0	6	0	0	0	0	B	B2	0	14	4	0	2	NA	NA	NA	NA	NA	NA
135	M3	Q	3	0	0	0	3	0	N	N2	0	3	2	0	15	NA	NA	NA	NA	NA	NA
142	M3	E	6	0	0	0	0	0	NA	NA	0	0	0	0	0	NA	NA	NA	NA	NA	NA
154	M3	E	5	1	0	0	0	0	NA	NA	0	0	0	0	0	NA	NA	NA	NA	NA	NA
215	M4	O	5	0	0	1	0	0	NA	NA	0	0	0	0	0	NA	NA	NA	NA	NA	NA
288	M12	O	6	0	0	0	0	0	NA	NA	0	0	0	0	0	NA	NA	NA	NA	NA	NA
311	M12	Q	6	0	0	0	0	0	NA	NA	0	0	0	0	0	NA	NA	NA	NA	NA	NA
334	M12	E	4	0	0	1	1	0	O	D5	2	6	0	4	8	1.05	1.145	0.681	1.26	1.58	2
374	M13	E	6	0	0	0	0	0	O	D6	19	0	0	0	0	1.172	1.27	0.772	1.41	2.311	4
375	M13	E	5	0	0	0	1	0	NA	NA	0	0	0	0	0	NA	NA	NA	NA	NA	NA
405	M14	B	2	2	0	0	2	0	B	B7	0	6	1	0	0	NA	NA	NA	NA	NA	NA
483	M15	E	5	0	0	0	1	0	NA	NA	0	0	0	0	0	NA	NA	NA	NA	NA	NA
567	M17	O	5	0	0	0	1	0	NA	NA	0	0	0	0	0	NA	NA	NA	NA	NA	NA
583	M17	Q	4	0	0	0	2	0	NA	NA	0	0	0	0	0	NA	NA	NA	NA	NA	NA
595	M17	E	6	0	0	0	0	0	NA	NA	0	0	0	0	0	NA	NA	NA	NA	NA	NA
640	M20	Q	4	0	1	0	1	0	NA	NA	0	0	0	0	0	NA	NA	NA	NA	NA	NA

## Sheet: personality tests
All personality data are given in seconds (out of 120).
individual number	phototactic	Phototactic/2	active	fields	dead_non_nestmate	cricket	brood	aggression	headwidth_mm	Thoraxwidth_mm	Ovarylength_mm	yellowbodies_number	Kol	Ind	Type
1	200	100	120	17	28	21	37	3	1.165	0.766	1.491	5	M20	1	O
2	237	118.5	117	21	5	2	15	3	1.077	0.691		0	M15	1	O
3	140	70	117	34	29	3	22	4	1.132	0.727		0	M9	2	O
4	90	45	120	36	21	9	85	4	1.212	0.754	1.221	1	M17	2	O
5	204	102	119	39	4	4	120	4	1.249	0.785		0	M17	3	O
6	107	53.5	120	36	90	1	11	2	1.051	0.683	0.813	0	M9	4	O
7	238	119	118	23	6	30	2	4	1.266	0.77	1.159	0	M17	4	O
8	121	60.5	120	26	19	9	3	3	1.109	0.732	1.576	0	M17	5	O
9	90	45	118	11	26	3	120	3	1.136	0.763	2.141	1	M9	6	O
10	167	83.5	118	17	13	6	29	3	1.135	0.747	1.508	0	M15	6	O
11	216	108	118	41	31	3	25	3	1.134	0.725	1.115	0	M15	7	O
12	238	119	105	17	29	2	106	3	1.148	0.781	1.205	0	M9	7	O
13	187	93.5	120	29	49	1	45	3	1.112	0.753	0.933	1	M9	8	O
14	196	98	95	18	4	4	1	3	0.968	0.631		0	M17	8	O
15	214	107	119	16	17	6	2	4	1.15	0.783		0	M20	9	O
16	15	7.5	119	16	13	1	2	2	0.913	0.586	0.864	0	M15	9	O
17	177	88.5	88	27	5	3	8	2	1.108	0.739	1.893	0	M20	10	O
18	171	85.5	117	25	8	11	72	3	1.203	0.793		0	M20	11	O
19	231	115.5	83	16	23	2	60	3	1.218	0.8	1.534	0	M20	12	O
20	225	112.5	98	9	4	7	56	3	1.15	0.756	1.942	0	M15	13	O
21	149	74.5	117	34	17	7	1	2	0.935	0.611	0.701	2	M15	16	O
22	238	119	114	8	5	3	116	2	0.991	0.671	0.923	1	M9	16	O
23	66	33	119	36	92	6	107	4	1.203	0.786	1.318	1	M20	17	O
24	120	60	111	40	4	3	45	3	1.02	0.656	1.402	1	M17	17	O
25	120	60	73	10	50	39	120	1	1.114	0.725	1.878	0	M9	1	B
26	2	1	2	14	8	44	120	2	1.13	0.756	1.177	0	M20	3	B
27	154	77	81	14	51	9	119	2	1.121	0.725		0	M20	4	B
28	14	7	15	9	23	17	118	2	1.143	0.767	2.701	0	M20	6	B
29	234	117	90	34	3	1	120	3	1.08	0.698	1.875	0	M15	8	B
30	108	54	104	22	3	2	51	3	1.105	0.736	1.698	0	M20	8	B
31	120	60	51	16	7	2	98	3	1.021	0.664	1.767	0	M17	9	B
32	8	4	85	16	7	3	120	2	1.086	0.693	1.066	0	M17	10	B
33	120	60	32	6	4	4	120	2	1.131	0.736	1.523	0	M9	10	B
34	107	53.5	28	16	1	1	103	1	1.174	0.76	2.434	0	M15	10	B
35	12	6	17	16	1	7	120	1	1.064	0.691	1.752	0	M17	11	B
36	120	60	7	10	14	3	113	1	1.032	0.675		0	M9	11	B
37	58	29	17	12	24	1	60	1	1.149	0.741	1.412	0	M15	11	B
38	111	55.5	106	11	3	1	120	2	1.047	0.691	2.212	0	M9	12	B
39	31	15.5	62	9	5	5	120	1	1.069	0.687	1.054	0	M15	12	B
40	4	2	102	15	7	26	120	2	1.01	0.655	1.112	0	M17	12	B
41	28	14	52	13	11	23	115	1	1.007	0.65	1.725	0	M17	13	B
42	156	78	25	24	6	6	120	1	1.107	0.709	1.545	0	M15	14	B
43	143	71.5	104	44	3	4	83	2	1.086	0.736	1.65	0	M17	14	B
44	134	67	20	8	3	8	68	3	1.217	0.813	2.063	0	M20	15	B
45	174	87	114	17	3	5	93	3	1.052	0.674	1.026	0	M9	15	B
46	47	23.5	99	14	15	3	96	2	1.109	0.735	1.466	0	M20	16	B
47	3	1.5	88	11	2	4	120	2	1.172	0.74	1.29	0	M15	17	B
48	120	60	7	30	18	1	51	2	1.16	0.757	1.544	0	M9	18	B
49	228	114	120	19	12	6	36	3	1.148	0.741		0	M20	1	E
50	99	49.5	104	18	15	15	55	3	1.044	0.672	1.329	0	M17	1	E
51	90	45	120	26	11	2	118	2	1.108	0.718	0.926	0	M9	1	E
52	128	64	103	17	22	11	115	3	1.093	0.7	1.122	0	M15	1	E
53	50	25	4	22	7	46	55	2	1.127	0.723	1.412	0	M20	2	E
54	173	86.5	73	27	23	2	17	1	0.986	0.653	1.14	0	M17	2	E
55	224	112	111	32	29	8	24	2	1.124	0.729	1.183	0	M9	2	E
56	120	60	120	11	60	13	117	1	1.062	0.737	1.148	0	M15	2	E
57	42	21	120	21	38	11	120	2	1.101	0.743	1.053	0	M20	3	E
58	120	60	114	14	7	5	82	2	0.962	0.655	1.067	0	M17	3	E
59	203	101.5	117	16	1	10	76	1	1.019	0.678	1.05	0	M9	3	E
60	222	111	120	21	59	9	120	2	1.031	0.634	1.526	0	M15	3	E
61	41	20.5	66	29	37	7	24	1	1.207	0.793		0	M20	4	E
62	120	60	43	15	11	3	52	2	0.994	0.588		0	M17	4	E
63	146	73	120	20	28	1	40	2	1.133	0.75	1.422	0	M9	4	E
64	123	61.5	120	29	6	2	85	2	0.993	0.635	1.396	0	M15	4	E
65	163	81.5	113	29	56	15	97	1	0.932	0.62		0	M15	5	E
66	154	77	117	46	10	33	26	2	1.084	0.666	1.882	0	M17	5	E
67	231	115.5	120	15	37	136	41	1	1.099	0.728		0	M9	5	E
68	115	57.5	118	37	36	10	16	2	1.278	0.793	1.897	0	M20	5	E

## Sheet: behavioral consistency
individual no.	colony	behavioral_caste	activ1	photo1	brood1	activ2	photo2	brood2
2	e	B	71	3.5	104	108	60	18
10	e	B	69	60	96	74	37.5	51
15	e	B	103	117	83	117	109.5	72
21	f	B	26	12.5	120	65	0	107
23	f	B	45	9	116	79	33	108
25	e	B	96	24.5	44	55	0	110
26	e	B	84	0	66	116	87.5	118
27	e	B	114	111	120	97	63.5	120
28	e	B	113	64	120	92	37	120
29	e	B	69	60	102	93	26.5	120
30	e	B	62	23	117	120	69	120
31	e	B	61	0	118	96	74	120
32	e	B	22	60	119	65	0	120
33	e	B	85	85	120	114	89	120
38	f	B	112	25.5	120	109	90.5	120
39	f	B	110	50	120	87	73	120
40	f	B	70	0	120	114	40.5	120
41	f	B	23	10.5	120	105	60.5	120
42	f	B	106	96.5	120	98	88	120
43	f	B	82	12.5	120	109	95	120
44	f	B	45	38	120	109	26	120
45	f	B	0	0	120	87	60	120
46	f	B	54	0	120	79	90	120
48	d	B	0	76.5	105	0	1	1
50	a	B	59	0.5	108	116	24	18
52	a	B	9	11	51	30	104.5	26
54	c	B	45	4.5	118	120	1	27
57	d	B	120	32.5	32	109	22.5	43
58	a	B	100	60	85	112	60	73
60	b	B	3	0.5	0	70	4.5	90
61	b	B	29	60	83	67	1	90
62	b	B	74	60	47	75	58	92
63	d	B	22	34	62	65	52.5	97
1	f	O	118	107.5	60	120	114	4
3	e	O	118	120	20	118	107	21
4	e	O	46	54.5	90	118	46.5	24
5	e	O	118	120	94	86	32.5	30
6	f	O	103	80.5	120	119	84	39
7	f	O	116	110.5	66	11	71	39
8	e	O	12	0	56	29	23	42
9	f	O	82	101	62	120	66	42
11	e	O	114	114	120	91	55.5	51
12	e	O	118	104.5	108	96	114.5	54
13	e	O	104	112.5	120	114	120	64
14	f	O	21	78	72	120	109	65
16	f	O	118	116.5	13	111	76.5	79
17	e	O	74	37	120	88	75	84
18	f	O	120	76.5	86	82	107	91
19	f	O	78	56.5	90	107	120	92
20	f	O	115	60	80	60	86	99
22	e	O	115	58.5	120	104	59.5	108
24	f	O	118	93.5	120	120	109.5	109
34	e	O	98	25	120	104	36.5	120
35	e	O	113	0	56	102	102	120
36	e	O	23	63.5	120	94	80	120
37	e	O	110	120	70	62	75	120
47	f	O	120	119	90	118	73	120
49	c	O	86	60	51	120	89	2
51	b	O	117	43	40	115	77.5	22
53	a	O	53	69	32	87	42.5	26
55	c	O	113	69	1	119	101.5	27
56	c	O	117	116.5	20	112	91.5	37
59	c	O	9	40.5	53	118	86.5	87
64	b	O	119	80	85	114	53	118
65	d	O	44	66	33	67	37.5	118

## Sheet: cuticular hydrocarbons
retention time	SE1O1W1	SE1O1W2	SEQ1O1W1	SEQ1O1W2	SEQ2O1W1v	SEQ2O1W2v	SE3O1W1v	SE3O1W2v	SEQ3O1W2v	SEQ4O1W1	SEQ4O1W2	SE5O1W1	SE5O1W2	SEQ5O1W1	SEQ5O1W2v	SE6O1W1	SE6O1W2w	SEQ6O1W1	SEQ6O1W2	SE7O1W1	SE7O1W2ww	SE8O1W1	SE8O1W2	SE2O1W1v	SE2O1W2	SE4O1W1v	SE4O1W2	SE9O1W2v	SE10O1W1v	SE10O1W2vv	SE1E1W1	SE1E1W2	SEQ1E1W1	SEQ1E1W2	SEQ2E1W1v	SEQ2E1W2v	SE3E1W1	SE3E1W2v	SEQ3E1W1v	SEQ3E1W2v	SEQ4E1W1	SEQ4E1W2	SE5E1W1	SE5E1W2	SEQ5E1W1	SEQ5E1W2	SE6E1W1w	SE6E1W2w	SEQ6E1W1
8,68	0	0	0	0	0	0	0	0	0	0	0	0	0	0	0	0	0	0	0	0	0	0	0	0	0	0	0	0	0	0	0	0	0	0	0	0	0	0	0	0	0	0	0	0	0	0	0	0	0
9,54	0	0	0	0	0	0	0	0	0	0	0	0	0	0	0	0	0	0	0	0	0	0	0	0	0	0	0	0	0	0	0	0	0	0	0	0	0	0	0	0	0	0	0	0	0	0	0	0	0
9,72	0.00156743	0.00103299	0.0020177	0.00422073	0.00206665	0.00571754	0.00103602	0.00142563	0.0020604	0.00164082	0.00187212	0.000708831	0.00144786	0.000728692	0.000814894	0.00121845	0.00340162	0.000712041	0.000836802	0	0.00161237	0.00385579	0.00253946	0	0.000614209	0.000625218	0.0022883	0.0014454	0.00070157	0.00232559	0.00096369	0.00381085	0.000920695	0.000599007	0.00364891	0.00131506	0.000529984	0.000715059	0.000920123	0	0.000906987	0.00310493	0.00130929	0.000911355	0.00195075	0.00202897	0.00218185	0.00177418	0.00073356
10,24	0.00667067	0.00669546	0.00372955	0.00527314	0.0049528	0.00493472	0.00650911	0.00710791	0.00236909	0.00436956	0.00457011	0.00212499	0.00413119	0.00405311	0.00213768	0.00354967	0.00569938	0.00122033	0.00240392	0.00584728	0.0097496	0.00312746	0.00591541	0	0.00276097	0.00395313	0.00847312	0.00244484	0.00130252	0.00285339	0.00640712	0.00823857	0.00143183	0.00159656	0.00873511	0.00353661	0.00907682	0.0059094	0.00265583	0.00333451	0.00161185	0.00875466	0.00352113	0.0021252	0.00842589	0.00756099	0.00609724	0.00375336	0.00261739
10,76	0.00448675	0.00443432	0.00262222	0.00663961	0.00361383	0.00795082	0.00289817	0.00345872	0.00411656	0.00524119	0.00446648	0.00161945	0.0043373	0.00260004	0.00284923	0.00324591	0.00580866	0.000915388	0.00188182	0.00324111	0.00849323	0.00541473	0.00359567	0.00171794	0.00306728	0.00467964	0.00609053	0.00377588	0.00070157	0.00696062	0.00534212	0.00760724	0.00173838	0.00119766	0.00624714	0.00262839	0.00518177	0.00387562	0.0017373	0.00212325	0.00120913	0.00620024	0.00271739	0.00121496	0.00562514	0.00575581	0.0040327	0.00219117	0.00198984
10,96	0.00114969	0.00123946	0.00211848	0.00485231	0.00206665	0.00783928	0.00134662	0.000916709	0.000618566	0	0.00228767	0.00111365	0.00299681	0.000832747	0	0.00213132	0.00362068	0.000203492	0	0	0.0054027	0.00354372	0.00232808	0	0	0	0.0041369	0.00100089	0	0.00401355	0.00149867	0.00644876	0.00132962	0.000499197	0.00416909	0.00111285	0.00201245	0.000510808	0.00112448	0	0.000705506	0.00374612	0.0016112	0.000911355	0.00184247	0.00106839	0.00272658	0.00156561	0.000524026
11,02	0.0038619	0	0	0	0	0	0	0	0.00350016	0.0133759	0.00394814	0	0	0.000624626	0.00264598	0.00446041	0.00219591	0	0.01041	0	0.0181608	0.00177343	0	0	0.0045974	0.00395313	0	0.000222506	0	0	0.0038492	0.00718613	0	0	0	0.000303628	0	0	0	0	0	0	0	0	0.0102529	0.00320176	0.00414146	0	0.00083831
11,46	0.00313242	0.00422851	0.00563934	0.00926221	0.00165366	0.0116249	0.00155364	0.000916709	0.00493784	0.00360626	0.00135244	0	0.00134451	0	0	0.00334717	0.00493404	0.000508653	0	0	0	0.00666013	0.00602072	0	0	0	0.00119928	0.00177866	0.00110225	0.00105776	0.00256778	0.00718613	0.00337174	0.000998146	0.00135686	0.00283029	0.00285858	0.000715059	0	0	0.00110843	0.00556062	0	0	0	0.00053434	0.00141875	0.00219117	0.000524026
12,36	0.00957515	0.00433142	0.00854726	0.0175047	0.00216987	0.0247627	0.0210269	0.0032556	0.00882975	0.00709087	0.0114893	0.0020239	0.0106034	0.00208057	0.00406785	0.00415693	0.00908169	0.00122033	0.00146394	0.00271906	0.00803598	0.014306	0.00549404	0.00564797	0.00663392	0.00395313	0.0320976	0.0106248	0.00190312	0.0166873	0.00672641	0.00886951	0.00479875	0.00219461	0.00375297	0.00111285	0.00454871	0.00489302	0.00987255	0.00494725	0.0063317	0.0185918	0.00592847	0.00293362	0.00400575	0.00352138	0.00761576	0.00302464	0.00230366
12,62	0.00208937	0.00484581	0.00292434	0.00716468	0	0.0101791	0.00155364	0.00112031	0.00247197	0	0	0	0.00165452	0	0	0.00213132	0.00362068	0.000406943	0	0	0.000691334	0.00489535	0.00570474	0	0	0	0.00098134	0.00100089	0.000801755	0	0.00256778	0.00539443	0.00204484	0.000698806	0.00271189	0.00182039	0.00232983	0.00163367	0.000511284	0	0.000806251	0.00630681	0	0	0	0.000427495	0.000982424	0.00156561	0.00083831
12,88	0.00250672	0.00381675	0.00433304	0.00716468	0	0.0104017	0.0017606	0.00183258	0.00257484	0	0	0	0.00196444	0	0	0	0.00471527	0	0	0	0	0.00479145	0.00570474	0	0	0	0.0030499	0	0	0	0.00267463	0.00687018	0.0028616	0.00139712	0	0	0.0024356	0	0	0	0.00141051	0	0	0	0	0	0.00141875	0.00146132	0
13,10	0.0038619	0.00433142	0.00161449	0	0	0	0.00238125	0	0	0	0.00270304	0.000303846	0	0.00041646	0	0	0.00186683	0.000508653	0.000523083	0.00136046	0.00161237	0	0	0.00605018	0.00531065	0.00301827	0.00370224	0	0	0.00105776	0.00523555	0	0.0025554	0.000898376	0	0	0.00137737	0	0	0.000607102	0.00130983	0	0.000604503	0	0	0.00053434	0.000764191	0.00135701	0.0011525
13,16	0.00323666	0.00185862	0	0	0.0014471	0	0.00300152	0.00376333	0	0	0.00218379	0.001316	0.00144786	0.00249616	0.00274761	0	0	0.000406943	0.00073224	0.00303232	0.00448515	0	0	0	0	0	0.00359355	0.00133429	0.00210324	0.00179753	0.00587476	0	0	0.0012974	0	0	0.00454871	0.00580781	0.00265583	0.000607102	0.00130983	0	0.00201359	0	0.00476179	0.00384089	0.00261766	0.00104401	0.00157126
13,62	0.00156743	0	0.00383016	0.00379946	0	0.00582933	0.00103602	0	0.00113374	0	0	0	0	0	0	0	0.00263452	0	0	0	0	0.00343967	0.00338452	0	0	0	0	0	0	0	0.00171258	0	0	0.000798596	0	0	0.00201245	0.000715059	0.000715725	0	0	0.00449367	0	0	0	0.00106839	0.000982424	0	0.00104778
13,94	0	0	0	0	0	0.00806236	0	0	0.00123675	0	0	0	0	0	0	0.00142138	0	0	0	0	0	0.00468753	0.00422886	0.00272711	0	0.006856	0	0.00399755	0.00220328	0	0.00203337	0	0	0	0.00448108	0.00434322	0	0	0	0	0	0	0	0.000810134	0	0	0.000873313	0.00114836	0.00094305
14,38	0	0.00525714	0.00563934	0.0102047	0	0.0141776	0.00238125	0.00122209	0.00370567	0.00262403	0.00124847	0.000405108	0.00361572	0.000728692	0	0	0.0060272	0.00101705	0.000941353	0	0	0.00697124	0.0045453	0	0	0	0.00424554	0	0.00070157	0	0.0038492	0.00750198	0.00469689	0.00159656	0	0	0.00211825	0.00193969	0	0	0.00221563	0.00726538	0	0.0014173	0	0	0.00207288	0.0016699	0.00104778
14,54	0	0.00258048	0.00191691	0.00474707	0	0.00627633	0	0	0.000927705	0	0	0	0.00175784	0	0	0	0.00175712	0.000508653	0	0	0	0.00499925	0.00391231	0	0	0	0.0022883	0	0	0	0.00160563	0.00359952	0.00214697	0.000698806	0	0	0.000635947	0	0	0	0	0.00331871	0	0	0	0	0.000873313	0.000417737	0
15,32	0.0175192	0.00474296	0.0106477	0.0212383	0	0.0137341	0.0251797	0.000713069	0.00831852	0.0156419	0.0199949	0.0049513	0.0123427	0.00922549	0.0102396	0.0100081	0.00908169	0.00111869	0.00646697	0.00709584	0.0125991	0.0188247	0	0.00996325	0.0137293	0.0130482	0.0304059	0.0143609	0.00430189	0.0114696	0.0120328	0.00623799	0.0025554	0.00169626	0	0	0.00275285	0.00204167	0.0071343	0.00876711	0.0149108	0.0170117	0.00522693	0.00101257	0.0059487	0.00405384	0.0106459	0.00177418	0.00293102
15,40	0.0977573	0.031737	0.0509889	0.0991762	0.0217933	0.107052	0.143353	0.0360283	0.0775578	0.0601205	0.0915574	0.0788583	0.122115	0.0495696	0.0689981	0.0587907	0.066338	0.0199475	0.0398998	0.0437452	0.110639	0.101957	0.0587356	0.113649	0.0779794	0.258903	0.191162	0.145345	0.0530107	0.164634	0.051772	0.0398173	0.0211649	0.0128002	0.139656	0.0145709	0.0352092	0.0544871	0.10192	0.104196	0.0628138	0.111886	0.0675102	0.0393341	0.0600997	0.0397146	0.0751877	0.0194474	0.0321843
15,50	0.00365353	0	0	0.00485231	0.00762535	0.0098452	0	0.00193429	0.00411656	0	0	0	0	0	0	0	0.00186683	0	0	0	0	0	0.00654713	0	0	0	0	0	0	0	0	0	0	0	0	0	0	0	0	0	0	0	0	0	0	0	0	0	0
15,94	0.0173137	0.0187369	0.0234547	0.0199953	0.00988118	0.021797	0.0356371	0.0163735	0.0158581	0.0100216	0.0100474	0.0062608	0.0156085	0.0114929	0.0133616	0.0128206	0.0186212	0.0127398	0.00895913	0.0166166	0.0132818	0.0169786	0.0170175	0.0171474	0.013022	0.0152064	0.011713	0.00808955	0.0148282	0.00580388	0.0218284	0.022028	0.0182547	0.0151637	0.00883864	0.0107728	0.0188006	0.0173232	0.0105812	0.00896776	0.0142152	0.0178548	0.0173839	0.0178721	0.00605653	0.0117957	0.0120496	0.016061	0.0108436
16,06	0.0137098	0.0125302	0.00453412	0.00632444	0.00165366	0.00347926	0.00496316	0	0.01128	0.00426055	0.00519169	0.00464886	0.00691012	0.00602177	0.00882652	0.00880032	0.0116924	0.00598568	0.00407281	0.00719981	0.00666296	0.0195416	0.0106436	0.0122638	0.00449546	0.00964723	0.00381092	0.0146899	0.0151245	0.0108417	0.0134079	0.0119134	0.00479875	0.00418553	0.00312845	0.00585387	0.00232983	0.0042827	0.00977127	0.0054507	0.00673237	0.00513398	0.00842997	0.013084	0.00270834	0.00575581	0.0124811	0.0101846	0.00501935
16,20	0.0232574	0.0206623	0.0227639	0.0213419	0.0279481	0.0230063	0.0244719	0.0147683	0.0219299	0.0165037	0.0194846	0.00847299	0.0124449	0.0115958	0.0204753	0.0215093	0.0213148	0.0130412	0.0106171	0.0151737	0.0181608	0.0168759	0.0171217	0.0318527	0.0237789	0.0307917	0.0418747	0.0151283	0.0166047	0.0211527	0.0214091	0.0222355	0.0210646	0.0120112	0.0459291	0.0261753	0.0196327	0.0266201	0.030025	0.0285363	0.01749	0.0312476	0.012917	0.0135839	0.00939355	0.0107387	0.0258732	0.0198571	0.0135362
16,34	0	0	0	0	0	0	0	0	0	0	0	0	0	0	0	0	0	0	0	0	0	0	0	0	0	0	0	0	0	0	0	0	0	0	0	0	0	0	0	0	0	0	0	0	0	0	0	0	0
16,44	0.00302816	0.00525714	0.00191691	0	0.00237628	0	0.00300152	0.00274761	0.00175161	0	0.00218379	0.00141716	0.00196444	0.00374191	0.00142563	0	0.00307293	0.00355515	0.00177737	0.00480563	0.00253256	0	0	0.00323132	0	0	0	0.00299966	0	0	0.00544867	0	0.00388162	0.00458324	0	0.00333485	0.00613061	0.00377382	0.00112448	0.00161812	0.00191379	0	0.00311934	0.00545571	0.00400575	0.00256223	0.00370633	0.00437756	0.00240825
16,56	0.00978229	0.00710602	0.00884759	0.0110416	0.00289211	0.00995652	0.00949118	0.00569036	0.00688569	0.00839447	0.0062268	0.0048505	0.0163215	0.00622877	0.00579168	0.00607746	0.00613645	0.00385929	0.00303008	0.0101068	0.00929292	0.012039	0.00581008	0.00675365	0.0054125	0.00809751	0.00868944	0.0176458	0.00529969	0.0141862	0.00832128	0	0.00866183	0.00637098	0.00208672	0.00655806	0.0110711	0.0090536	0.00510112	0.00323363	0.00583065	0.0152179	0.0100276	0.00746882	0.00378963	0.00469242	0.00902375	0.0062478	0.00366243
16,72	0.0108173	0.0146713	0.0183119	0.013757	0.0251277	0.0118471	0.0056849	0.0179762	0.0160611	0.00774288	0.00798404	0.00545516	0.00875847	0.00994749	0.00761369	0.0113149	0.0140796	0.0110304	0.00760998	0.0103141	0.00528805	0.0103871	0.00843991	0.0133622	0.0134262	0.00882101	0.00847312	0.0033324	0.00539941	0.00369727	0.011927	0.0162011	0.0268602	0.0238798	0.0111136	0.031388	0.0164046	0.0129952	0.0108848	0.0124725	0.0123249	0.00832938	0.0114235	0.0104809	0.00432984	0.00809131	0.0122654	0.0224139	0.00939071
17,00	0.0103	0.00412558	0.00543848	0.0152161	0.00320148	0.00839688	0.0113377	0.00558903	0.00586098	0.00958795	0.0101505	0.0109809	0.0131602	0.00881268	0.00629813	0.00597647	0.0099527	0.00314948	0.01041	0.00657579	0.0149865	0.010697	0.00686284	0.00835974	0.0118084	0.0198156	0.0205155	0.0102945	0.00480091	0.0195973	0.00906469	0	0.00428934	0.00189563	0.0124555	0.00161829	0.00697327	0.00631566	0.00835223	0.00926864	0.00643188	0.0160625	0.00783018	0.00454849	0.0119694	0.00713654	0.011294	0.00385742	0.00710334
17,14	0.00521526	0.0056683	0.00604093	0.0130267	0.00443802	0.00482283	0.0050663	0.00498084	0.00473259	0.00480547	0.00374073	0.00161945	0.00299681	0.0054005	0.00315402	0.00375213	0.00733741	0.00335234	0.00250831	0.00324111	0	0.00572622	0.00780938	0	0.005718	0.00592385	0.00457137	0.00188972	0.00430189	0.00496177	0.00619421	0	0.00947321	0.00587471	0.00520866	0.00726176	0.00876157	0.00722914	0.00357351	0.00232523	0.00332161	0.00726538	0.00502639	0.00434678	0.00411379	0.00288205	0.00642283	0.00738901	0.00272194
17,22	0	0	0	0	0	0	0	0	0	0	0	0	0	0	0	0	0	0	0	0	0	0	0	0	0	0	0	0	0	0	0	0	0	0	0	0	0	0	0	0	0	0	0	0	0	0	0	0	0
17,58	0.00874616	0.0165029	0.0175184	0.0213419	0.00824108	0.0225667	0.00650911	0.0183765	0.010566	0.0108883	0.0062268	0.00666338	0.0108082	0.00922549	0.0171752	0.0067841	0.0159204	0.00881385	0.0108242	0.00647175	0.00597574	0.0193368	0.0142013	0.0131626	0.0101879	0.0139737	0.00955425	0.00797918	0.0147294	0.00664528	0.018048	0.0255492	0.0282541	0.0206568	0.0108037	0.0200428	0.0212947	0.0185277	0.00662639	0	0.0155066	0.0133151	0.0134143	0.00947788	0.005733	0.00681808	0.00696524	0.00904663	0.00907911
17,62	0.0101964	0.00628472	0.0124446	0.0115644	0.0135616	0	0.0175699	0	0.00780703	0.00524119	0.00746753	0.00545516	0.00608754	0.011287	0	0.0124193	0.00569938	0.00618795	0.0136153	0.00667982	0.0172549	0.0104904	0.00822978	0	0.0094781	0	0.019874	0.0169897	0	0	0.0152032	0	0	0	0.0120428	0	0	0	0.0149237	0.0253836	0	0.00620024	0	0.00595937	0.00713421	0.00575581	0.00522848	0.00697417	0.00803971
17,74	0	0	0	0	0	0	0	0	0	0	0	0	0	0	0	0	0	0	0	0	0	0	0	0	0	0	0	0	0	0	0	0	0	0	0	0	0	0	0	0	0	0	0	0	0	0	0	0	0
17,86	0	0	0	0	0	0	0	0	0	0	0	0	0	0	0	0	0	0	0	0	0	0	0	0	0	0	0	0	0	0	0	0	0	0	0	0	0	0	0	0	0	0	0	0	0	0	0	0	0
17,94	0.00313242	0.00371379	0	0.0077944	0.00628997	0.0132904	0.00145013	0	0.00247197	0.00491441	0	0.001316	0.00547016	0.00135286	0	0	0.00657333	0	0	0.0024057	0.00414085	0.00676384	0.00391231	0.000909863	0	0.00840764	0.00533124	0.00133429	0	0	0.00374248	0.00844893	0.00347374	0	0	0	0.00338705	0.00204167	0.000715725	0	0.00151119	0.017328	0.0016112	0.0021252	0	0	0.00174586	0.00135701	0.0013619
18,04	0.00998939	0.00987296	0.0119458	0.0064295	0.00227308	0	0.00403444	0.00953332	0.00678327	0.00958795	0.00498454	0.00515287	0.0079374	0.0119046	0.00447372	0.00859888	0.00897277	0.0104264	0.0120656	0.0107286	0.00895028	0.00676384	0	0.00564797	0.0104919	0	0	0.0045515	0	0	0.0122445	0.0211977	0.0144286	0.0138842	0	0.0105725	0.00918188	0.00682325	0.00306379	0.00373794	0.00763327	0	0.00823008	0.0113828	0.0141109	0.00946882	0.0138823	0.00997783	0.00710334
18,22	0.00219372	0.00299274	0	0	0	0.00415127	0.00712682	0.0032556	0.00668083	0.0105634	0.00394814	0	0	0	0	0.00496602	0.00690086	0.00203306	0	0.00219674	0	0	0	0	0.00235242	0	0	0.00177866	0	0	0.00374248	0	0.00418743	0.0024935	0	0	0.00328138	0	0.00499935	0	0.00261794	0.0166954	0.00211416	0.00202411	0.00151758	0.00234896	0.0105378	0.00437756	0.00251283
18,56	0.0184437	0.0100776	0.0175184	0.0199953	0.00247946	0.0155069	0.00753842	0.00305243	0.00831852	0.0337984	0.0269099	0.0145813	0.0126493	0.0270196	0.0166742	0.0275567	0.0186212	0.00800662	0.0454149	0.0158954	0.0110044	0.0134822	0.00612603	0	0.0214764	0.0116068	0.0241427	0.0111751	0.0039025	0.0139775	0.00959536	0.00781773	0.0100813	0.00139712	0.0125586	0	0.00665736	0.00743202	0.00997383	0.0162638	0.0108299	0.0267684	0.00502639	0.00323661	0.0239032	0.0149599	0.0163565	0.00344112	0.021776
18,64	0.0533499	0.0141619	0.0303362	0.0568291	0.0140717	0.0486058	0.0656892	0.0208746	0.0406204	0.044955	0.0567605	0.0736961	0.0649107	0.0379071	0.046102	0.0375876	0.0286049	0.0178506	0.0570467	0.0320493	0.0735325	0.0438185	0.037533	0.0547106	0.0525588	0.115073	0.0784417	0.0934115	0.039706	0.0926228	0.0333958	0.0175568	0.0156384	0.0100358	0.10763	0.0107728	0.0192167	0.027714	0.0540522	0.0732617	0.0414732	0.0559871	0.0366105	0.0236273	0.0535404	0.0327041	0.0441169	0.0103914	0.0329961
18,92	0.00698226	0.00884906	0.0122451	0.00621935	0.0103932	0.00370332	0.00609709	0.0101388	0.00565591	0.00850303	0.00726085	0.00303432	0.00402812	0.00529692	0.0042708	0.00354967	0.00405866	0.00497367	0.00417702	0.00605548	0.00895028	0.00375178	0.00496707	0.00715542	0.0102892	0.00789069	0.00598209	0.0160047	0.0122565	0.00685552	0.00619421	0.00792296	0.0211649	0.00825458	0.00780285	0.0100716	0.00960202	0.00854714	0.00469398	0.00595389	0.00703276	0.00374612	0.00532718	0.00475017	0.00303285	0.00352138	0.0040327	0.00520921	0.00314005
19,16	0.122764	0.138472	0.153685	0.105	0.144685	0.108263	0.177867	0.14339	0.123623	0.0887774	0.109446	0.106647	0.117709	0.132089	0.165309	0.12127	0.118737	0.129793	0.0932512	0.1153	0.0975514	0.14541	0.121557	0.125495	0.105999	0.113213	0.0662645	0.116552	0.1524	0.0834159	0.125767	0.142405	0.0173499	0.157745	0.104625	0.161025	0.134051	0.171002	0.119772	0.105927	0.112859	0.0818105	0.160115	0.175869	0.120452	0.141413	0.0909669	0.131186	0.113546
19,28	0.0184437	0.0206623	0	0.010414	0.0261359	0.0152855	0	0	0.024147	0.0132679	0.0146745	0.0281655	0.0159142	0.0235674	0.0289257	0.0306159	0.019484	0.0225375	0.0153686	0.018366	0.0132818	0.0262767	0.0189946	0.0227985	0.0110997	0	0.00890571	0.0364887	0.0401877	0.0300243	0.0235041	0.0170356	0.0235668	0.0232946	0.0146194	0.0358903	0	0	0.0227528	0.0234081	0.0140164	0.0101356	0.0273377	0.0390418	0.0193383	0.0235582	0.0321325	0.0288281	0.019414
19,44	0.0462857	0.0377265	0.0426048	0.0414265	0.0445079	0.0361048	0.0314271	0.0419088	0.0546811	0.0516312	0.0615685	0.077453	0.0435403	0.055498	0.0706137	0.0543743	0.0379608	0.0515609	0.0474129	0.0537192	0.0623326	0.0340774	0.0662994	0.0483706	0.0711364	0.0415487	0.0545572	0.05203	0.0526303	0.0841945	0.0390781	0.035118	0.0563124	0.0371499	0.0913675	0.0308974	0.055875	0.0824459	0.0780833	0.0779539	0.0682905	0.0614475	0.0544251	0.0301363	0.069049	0.0514598	0.0593614	0.0352015	0.0555613
19,60	0.0515637	0.0647283	0.0414428	0.0295884	0.0535689	0.0162815	0.0205193	0.0891471	0.0289673	0.0267885	0.026403	0.053929	0.0489752	0.0606077	0.0521172	0.0494548	0.0318042	0.0796717	0.0456149	0.0477468	0.0247042	0.0382064	0.043434	0.068311	0.0610723	0.0135625	0.0140822	0.0270034	0.0318705	0.0192859	0.0422667	0.0653753	0.0954895	0.106832	0.0226158	0.0951353	0.0778893	0.0462278	0.0217525	0.0303053	0.052344	0.0140555	0.0833976	0.109022	0.0460059	0.0593483	0.0313919	0.0693033	0.0596189
19,76	0.0494758	0.0548958	0.0288656	0.0191658	0.0344651	0.0145101	0.0252808	0.0526007	0.0330664	0.0314672	0.0304505	0.0807288	0.0566324	0.0487765	0.0427879	0.0600353	0.0458662	0.0419472	0.0264363	0.0669303	0.037886	0.0585006	0.0466749	0.0352758	0.039159	0.0230804	0.0223307	0.0500211	0.0369078	0.0429831	0.0492257	0.0422603	0.0503936	0.0505311	0.0190355	0.054275	0.0354139	0.0253257	0.0299258	0.0396877	0.0347768	0.0219544	0.0692985	0.0718194	0.0344393	0.0457576	0.0588466	0.0650058	0.0312703
19,94	0.0504706	0.0730251	0.0918866	0.0513195	0.136327	0.0398932	0.0392316	0.114094	0.0879059	0.044222	0.0471738	0.0463178	0.0444317	0.0502631	0.0452258	0.0736247	0.0548547	0.0722208	0.0458148	0.0703524	0.0392168	0.0473101	0.037635	0.0886949	0.0763679	0.0302862	0.0309348	0.0279776	0.0552901	0.0263202	0.0587664	0.0693413	0.0122068	0.114876	0.0670523	0.142237	0.0865806	0.0889179	0.073342	0.0905139	0.0782227	0.0267684	0.0576649	0.0508581	0.0369516	0.0476959	0.0559593	0.0978385	0.056057
20,20	0.00188063	0.00484581	0	0	0	0	0	0	0	0	0	0.00242819	0	0.00114485	0	0.00334717	0.00449645	0	0	0.00324111	0	0	0	0	0	0	0	0	0	0	0	0	0	0	0	0	0	0	0	0	0	0	0	0.00646277	0	0	0.0106459	0.00925363	0
20,24	0.00479903	0.00464009	0.00443358	0.00884305	0	0.00471094	0.00403444	0	0.00339739	0.00785151	0.00570938	0.0105801	0.0117292	0.00643573	0.00477802	0.00577446	0.00635491	0.0053786	0.013512	0.00688785	0.00815031	0.00790398	0.0139924	0.00141499	0.00500503	0.00561294	0.00901383	0.0032215	0.00310322	0.008221	0.00991362	0	0	0	0.00562418	0	0.00359836	0	0.00347159	0.00262812	0.00462709	0.0106662	0.00552765	0.00444764	0.0101455	0.00628709	0.00945658	0.0055209	0.00866348
20,36	0.00998939	0.0211684	0.0239478	0.0152161	0.0346649	0.0101791	0.00897767	0.023665	0.0188986	0.0161806	0.0123123	0.0112814	0.0164233	0.0138579	0.0105422	0.0166249	0.0128867	0.0179506	0.0148532	0.0173373	0.00929292	0.0084218	0.0115866	0.0125635	0.0166541	0.00467964	0.0111737	0.0229882	0.0263196	0.0162708	0.0156251	0.0175568	0.0460048	0.0336799	0.0126618	0.0317803	0.0278122	0.017524	0.0158302	0.0161642	0.016102	0.00960468	0.0185717	0.012684	0.0128266	0.0123237	0.0166788	0.0305519	0.0186941
20,78	0.0217236	0.0296322	0.0260162	0.0278417	0.0735646	0.0367553	0.0207223	0.0362249	0.0272628	0.0259355	0.0227463	0.0230311	0.0386734	0.026107	0.0302119	0.0215093	0.0364782	0.0327327	0.0225561	0.027475	0.0262773	0.0265818	0.0275856	0.0231939	0.0258766	0.0213473	0.0276506	0.0168803	0.0370044	0.0220848	0.0227713	0.0276148	0.047665	0.0303916	0.0201621	0.0422179	0.032647	0.0288068	0.021252	0.0238035	0.0208529	0.0212198	0.0219296	0.0319041	0.0254907	0.0267896	0.029379	0.0397292	0.0279117
21,24	0.016594	0.0171126	0.0170221	0.0102047	0.0164148	0.00716974	0.00671505	0.0142661	0.0109741	0.0151028	0.0103566	0.0154794	0.0132623	0.012419	0.0101388	0.0113149	0.0151628	0.0144463	0.0133055	0.0146578	0.0127129	0.0134822	0.0225227	0.0127632	0.0185657	0.0100601	0.011713	0.0110651	0.0135432	0.00832596	0.0146755	0.0172441	0.0321269	0.0167362	0.00914917	0.0127736	0.0135845	0.00996459	0.00764195	0.00685901	0.0108299	0.00609367	0.012917	0.0163783	0.00540937	0.0155916	0.0124811	0.0178069	0.0121908
21,46	0	0	0	0	0	0.00649976	0	0	0.00657839	0.00839447	0.00311825	0.00222606	0	0.00197664	0	0	0.00351115	0.00284513	0	0	0	0	0.00296208	0	0	0	0	0	0	0	0	0	0.00326974	0.00299145	0	0.00222447	0.00232983	0	0.00285983	0	0	0.0105601	0	0.00313562	0	0.00160216	0.00544574	0.00364929	0.00334903
21,88	0.012781	0.00525714	0.0109474	0.0267099	0.0117231	0.0293587	0.0131807	0.010643	0.0187974	0.0304058	0.0259974	0.0324894	0.029069	0.017446	0.0176759	0.0130212	0.0216376	0.0114329	0.0471134	0.0151737	0.0282961	0.0194393	0.0243855	0.0103637	0.0169562	0.025522	0.0237166	0.0225531	0.0152232	0.0300243	0.0121386	0.00613258	0.00784979	0.00408608	0.0259797	0.00535058	0.00855135	0.00935736	0.0203504	0.0175575	0.0224315	0.0346715	0.0101274	0.00887558	0.026442	0.0143279	0.0237425	0.0062478	0.0298468
22,10	0	0	0	0	0	0	0	0	0.00339739	0.00426055	0	0	0	0	0.00122209	0	0	0	0	0	0.00322214	0	0.0063366	0	0.00235242	0	0.00630736	0	0	0.00105776	0	0	0.0055115	0	0	0	0.00444316	0.00193969	0	0	0	0	0	0.0021252	0	0.00277545	0.00141875	0	0
22,36	0.064981	0.0813488	0.0706593	0.0654828	0.056017	0.0716843	0.0960894	0.0657592	0.0819379	0.0884768	0.0909872	0.0651909	0.0510425	0.0990638	0.0962988	0.0868457	0.0909256	0.113121	0.0941088	0.0845025	0.0797246	0.075394	0.0697636	0.0640511	0.0571148	0.0269435	0.0310406	0.0535076	0.116556	0.0604693	0.0828192	0.0847576	0.0931611	0.0706454	0.0426318	0.0530278	0.0706049	0.0915323	0.095061	0.0704357	0.101811	0.0689821	0.0736147	0.0819509	0.100933	0.112796	0.0703133	0.0820863	0.10556
22,48	0.00708611	0.00618201	0.00914784	0.00464183	0.0145815	0.0145101	0	0.0118522	0.0122992	0.0098048	0.0115922	0.0132827	0.00464639	0.00860621	0.0113485	0.00960567	0.00755561	0.0115335	0.0114451	0.00906953	0.00906451	0	0.0119007	0.0086606	0.00734572	0.00488711	0	0.0149091	0.0239731	0.0184551	0.0049158	0.00644876	0.0126111	0.00686701	0.0126618	0.0124738	0.00560359	0.0102681	0.0183439	0.0171596	0.0099319	0.00822303	0.0142095	0.00977889	0.0106823	0.0129571	0.00902375	0.00977097	0.0118801
22,64	0.012058	0.00587382	0.00814667	0.0120869	0.00936894	0.0132904	0.00743553	0.0130599	0.00934072	0.0271082	0.0275177	0.0314102	0.0110129	0.0235674	0.0148687	0.0147246	0.0134291	0.0210441	0.0334438	0.0158954	0.0170283	0.00728225	0.0168092	0.00454106	0.020574	0.00343387	0.0139747	0.0151283	0.0157168	0.0221884	0.011927	0.00729143	0.00977731	0.00577542	0.0215942	0.00575323	0.018072	0.0193298	0.0243513	0.0218248	0.0234169	0.0181707	0.0138119	0.00585866	0.0390403	0.0250189	0.0164639	0.00780367	0.0362366
22,76	0.0397745	0.0614292	0.0299442	0.0152161	0.0421306	0.0129575	0.0139988	0.0441539	0.0345618	0.0257221	0.0209129	0.0301332	0.0184574	0.0339892	0.0287277	0.042663	0.0316978	0.0435072	0.0337473	0.0334682	0.0215507	0.0188247	0.0370227	0.0596776	0.051684	0.00861435	0.00814856	0.0177551	0.0347797	0.0166873	0.050245	0.0605952	0.0525323	0.043098	0.0243501	0.035011	0.0346973	0.0289061	0.0316119	0.0393958	0.027741	0.010454	0.0289054	0.0354305	0.0282364	0.0371429	0.0259796	0.0522986	0.0408765
23,00	0.0124712	0.0107936	0.0155317	0.0187508	0.0099836	0.0161709	0.0127715	0.01155	0.0125029	0.033375	0.0243732	0.0249102	0.017746	0.0209194	0.0112478	0.016525	0.014513	0.0324372	0.0410053	0.0282898	0.0220018	0.0118327	0.0170175	0.00605018	0.00724407	0.0079941	0.0102024	0.0241836	0.0319676	0.0223954	0.011927	0.00971013	0.0204632	0.0186004	0.00976994	0.00886834	0.0112808	0.00743202	0.009062	0.0103711	0.018975	0.0302077	0.0116228	0.0160793	0.0193383	0.0174842	0.0163565	0.0130756	0.0391642
23,12	0.0226442	0.0338374	0.0321959	0.0177125	0.0387531	0.0233358	0.0157349	0.0357334	0.0265601	0.0296621	0.026403	0.0198584	0.014079	0.0203073	0.0178761	0.0339606	0.0251809	0.0396026	0.0291842	0.0313391	0.0190659	0.0132762	0.0221083	0.0382006	0.0372864	0.0145903	0.0128983	0.0205931	0.0290502	0.0175196	0.0294508	0.0314248	0.0462002	0.0335833	0.0300421	0.0338374	0.0325444	0.0345488	0.0268437	0.0301089	0.0422468	0.0211148	0.0155995	0.0172749	0.0223132	0.0252274	0.0201098	0.0319693	0.0316766
23,50	0.00521526	0.00802919	0.00493616	0.0102047	0.00443802	0.00716974	0.00300152	0.00933143	0.00401385	0.00915413	0.00664055	0.00464886	0.012036	0.00581472	0.00457517	0.00365091	0.00755561	0.00951964	0.00542674	0.00782344	0	0.00291927	0.0045453	0.0031305	0.00429156	0.00778727	0.0149424	0.00488373	0.0107698	0.00380271	0.00576826	0.00423339	0.014025	0.00696619	0	0.00414163	0.0115953	0.00722914	0.00214564	0.00222424	0.00613131	0.00460041	0.00502639	0.00656342	0.00368155	0.00277545	0.00479381	0.00645539	0.00679101
23,90	0.00188063	0.00278664	0	0.00348339	0	0.00392732	0	0	0.00216331	0.00426055	0.0017682	0.00353914	0.00320316	0.00415682	0	0.00223269	0.00591794	0.00659239	0.00501034	0.00386721	0.00494403	0	0.00717846	0	0	0	0.00565672	0	0	0	0.00363574	0.00444459	0.00326974	0.00149684	0	0	0.0024356	0	0.0013288	0	0.00322111	0.00438691	0.00301887	0.001923	0.0059487	0.00618085	0.00305327	0.00146132	0.00533223
23,96	0.0024024	0.00391971	0.00443358	0.00369411	0.00196342	0.00538212	0.00465368	0.00538634	0.00288337	0.00535009	0.00342954	0.00151831	0.00309999	0.0027039	0.00822029	0.00304335	0	0.00243918	0.00428123	0.00501405	0.0034519	0	0.00822978	0	0.00367961	0	0.00619895	0.00200077	0.00599755	0.00200879	0	0.00370519	0.00673216	0.0027923	0	0	0.0029643	0.00651872	0.00214564	0.00121384	0.00322111	0.00769111	0	0.00161961	0.00335726	0.0044796	0.00218185	0.00281634	0.00293102
24,36	0.00448675	0.00515433	0.00674334	0.00537832	0.00247946	0.00750457	0.00320819	0.00234103	0.00401385	0.00893714	0.00508812	0.0034382	0.00968136	0.00695294	0.00305243	0	0.00307293	0.00325091	0.0100993	0.00938081	0.00826463	0	0.00980469	0.00242447	0.0045974	0	0.00847312	0	0.00350294	0.0021144	0.00640712	0.00592174	0.0142268	0.00378766	0	0	0.00655203	0.00275527	0.00214564	0	0.0060311	0.00769111	0.00562787	0.0035395	0.00799551	0.00756099	0.00479381	0.0029205	0.00793571
24,48	0	0	0	0	0	0	0	0	0	0	0	0	0	0	0	0	0	0	0	0	0	0	0	0	0	0	0	0	0	0	0	0	0	0	0	0	0	0	0	0	0	0	0	0	0	0	0	0	0
25,00	0	0	0	0	0	0	0	0	0	0	0	0	0	0	0	0	0	0	0	0	0	0	0	0	0	0	0	0	0	0	0	0	0	0	0	0	0	0	0	0	0	0	0	0	0	0	0	0	0
25,42	0.00687841	0.00843921	0.00714449	0.00695468	0.0014471	0.00750457	0.00692096	0.00558903	0.00493784	0.0241203	0.016417	0.0062608	0.0070129	0.0170366	0.0084224	0.00567345	0.0115838	0.0139447	0.0198925	0.020728	0.0185003	0.00551857	0.0115866	0	0.0020459	0	0.00478853	0.00299966	0.00460133	0.00232559	0.0124561	0.0105501	0.00856036	0.00309101	0	0	0.0112808	0.0042827	0.00438852	0	0.0115278	0.0102417	0.00743012	0.00454849	0.0257022	0.0207352	0.0170009	0.00468951	0.0144666
25,54	0.00407023	0.00402265	0.007345	0.00684967	0	0.00939979	0.00310486	0.00751255	0.00534823	0.00882863	0.00695075	0.00444718	0.00649892	0.00457155	0.00569036	0.00466269	0.00460586	0.00274365	0.00428123	0.00823897	0	0.00489535	0.0111676	0.00282797	0.00316936	0.0105759	0.00923003	0	0.00220328	0	0.00342224	0.00433899	0.00764668	0.00189563	0	0	0.00475977	0.0059094	0.00296182	0	0.00372348	0.0122564	0.00582828	0.0035395	0.00486975	0.00479881	0.00381513	0.00062654	0.00439331
25,74	0	0	0	0	0	0	0	0	0	0	0	0	0	0	0	0	0	0	0	0	0	0	0	0	0	0	0	0	0	0	0	0	0	0	0	0	0	0	0	0	0	0	0	0	0	0	0	0	0
25,80	0.00375772	0.0120197	0.0214798	0.0138613	0.0145815	0.0090656	0.0036214	0.0189766	0.0189998	0.0217665	0.0225427	0.0133826	0.00711566	0.0203073	0.0153706	0.0102093	0.018837	0.0295764	0.0290826	0.0234937	0.0138504	0.00924974	0.025832	0.00383603	0.00296519	0.00582022	0.00728253	0	0.00838653	0.00222	0.00874616	0.00644876	0.0306391	0.0168344	0.00655848	0.0059545	0.0221247	0.0105715	0.0133101	0.0105714	0.0147121	0.0133151	0.0122203	0.0124839	0.0237973	0.0283495	0.0137746	0.0172937	0.0236207
26,10	0	0	0	0	0	0	0	0	0	0	0	0	0	0	0	0	0	0	0	0	0	0	0	0	0	0	0	0	0	0	0	0	0	0	0	0	0	0	0	0	0	0	0	0	0	0	0	0	0
26,16	0	0.00381675	0.00262222	0	0.00155039	0	0	0.00295084	0	0.00469651	0.00332579	0.0019228	0	0.00374191	0.00122209	0.00192853	0.00186683	0.00396065	0.00261268	0.00292791	0.00195754	0	0.00232808	0	0.00214808	0	0	0	0	0	0.00363574	0.00211893	0.00347374	0	0	0	0.00465425	0.00173568	0.000920123	0	0.0027185	0.00342558	0	0	0.00249195	0.0037344	0.00185488	0.00135701	0.00501935
26,52	0	0	0	0	0	0	0	0	0	0	0	0	0	0	0	0	0	0	0	0	0	0	0	0	0	0	0	0	0	0	0	0	0	0	0	0	0	0	0	0	0	0	0	0	0	0	0	0	0
26,98	0	0	0	0	0	0	0	0	0	0	0	0	0	0	0	0	0	0	0	0	0	0	0	0	0	0	0	0	0	0	0	0	0	0	0	0	0	0	0	0	0	0	0	0	0	0	0	0	0
28,40	0	0	0	0	0	0	0	0	0	0	0	0	0	0	0	0	0	0	0	0	0	0	0	0	0	0	0	0	0	0	0	0	0	0	0	0	0	0	0	0	0	0	0	0	0	0	0	0	0
28,70	0	0	0	0	0	0	0	0	0	0	0	0	0	0	0	0	0	0	0	0	0	0	0	0	0	0	0	0	0	0	0	0	0	0	0	0	0	0	0	0	0	0	0	0	0	0	0	0	0
31,26	0	0	0	0	0	0	0	0	0	0	0	0	0	0	0	0	0	0	0	0	0	0	0	0	0	0	0	0	0	0	0	0	0	0	0	0	0	0	0	0	0	0	0	0	0	0	0	0	0
31,60	0	0	0	0	0	0	0	0	0	0	0	0	0	0	0	0	0	0	0	0	0	0	0	0	0	0	0	0	0	0	0	0	0	0	0	0	0	0	0	0	0	0	0	0	0	0	0	0	0
31,68	0	0	0	0	0	0	0	0	0	0	0	0	0	0	0	0	0	0	0	0	0	0	0	0	0	0	0	0	0	0	0	0	0	0	0	0	0	0	0	0	0	0	0	0	0	0	0	0	0
32,24	0	0	0	0	0	0	0	0	0	0	0	0	0	0	0	0	0	0	0	0	0	0	0	0	0	0	0	0	0	0	0	0	0	0	0	0	0	0	0	0	0	0	0	0	0	0	0	0	0
33,92	0	0	0	0	0	0	0	0	0	0	0	0	0	0	0	0	0	0	0	0	0	0	0	0	0	0	0	0	0	0	0	0	0	0	0	0	0	0	0	0	0	0	0	0	0	0	0	0	0
34,24	0	0	0	0	0	0	0	0	0	0	0	0	0	0	0	0	0	0	0	0	0	0	0	0	0	0	0	0	0	0	0	0	0	0	0	0	0	0	0	0	0	0	0	0	0	0	0	0	0
Caste	w	w	w	w	w	w	w	w	w	w	w	w	w	w	w	w	w	w	w	w	w	w	w	w	w	w	w	w	w	w	w	w	w	w	w	w	w	w	w	w	w	w	w	w	w	w	w	w	w
Colony	1	1	11	11	12	12	3	3	13	14	14	5	5	15	15	6	6	16	16	7	7	8	8	2	2	4	4	9	10	10	1	1	11	11	12	12	3	3	13	13	14	14	5	5	15	15	6	6	16
Position	O	O	O	O	O	O	O	O	O	O	O	O	O	O	O	O	O	O	O	O	O	O	O	O	O	O	O	O	O	O	E	E	E	E	E	E	E	E	E	E	E	E	E	E	E	E	E	E	E
[truncated: 170 more columns]

## Sheet: Legend
cuticular hydrocarbons: relative abundances for each compound are given; compounds are identified by their retention time.
Caste	w	worker
	q	queen
Position	B	near brood
	E	entrance
	O	outside
	Q	near queen
	N	elsewhere in the nest
subnest	B	only brood or queen tenders
	N	only workers from elsewhere in the nest
	O	only outside workers
